# Supplementary material
Source: PubMed Central journal article supplement (PMC4970321)
Supplement: NIHMS793677-supplement-01.pdf [file NIHMS793677-supplement-01.pdf]

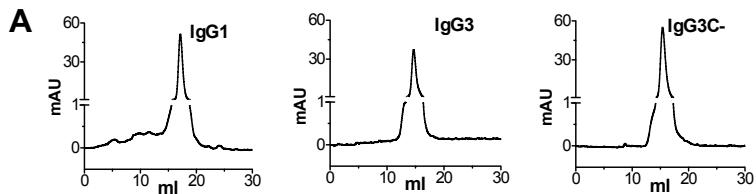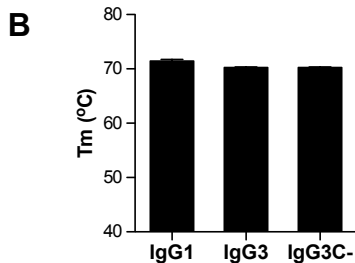

**C**

| Hinge Variant | Human                 |                      |                      |                      |                      | Mouse                |                      |                      |                      |                      |
|---------------|-----------------------|----------------------|----------------------|----------------------|----------------------|----------------------|----------------------|----------------------|----------------------|----------------------|
|               | FcγRI                 | Activating           |                      | Inhibitory           |                      | Activating           |                      |                      | Inhibitory           |                      |
|               |                       | FcγRIIa              |                      | FcγRIIIa             |                      | FcγRIIb              | FcγRI                | FcγRIII              | FcγRIV               | FcγRIIb              |
|               | H131                  | R131                 | V158                 | F158                 |                      |                      |                      |                      |                      |                      |
| <b>IgG1</b>   | $3.6 \times 10^{-10}$ | $5.8 \times 10^{-6}$ | $8.8 \times 10^{-6}$ | $1.9 \times 10^{-7}$ | $8.2 \times 10^{-7}$ | $9.6 \times 10^{-7}$ | $2.5 \times 10^{-7}$ | $1.4 \times 10^{-5}$ | $4.4 \times 10^{-7}$ | $8.9 \times 10^{-6}$ |
| <b>IgG3</b>   | $2.2 \times 10^{-10}$ | $7.2 \times 10^{-6}$ | $7.8 \times 10^{-6}$ | $1.1 \times 10^{-7}$ | $1.2 \times 10^{-6}$ | $8.9 \times 10^{-7}$ | $1.1 \times 10^{-7}$ | $1.1 \times 10^{-5}$ | $3.7 \times 10^{-7}$ | $7.4 \times 10^{-6}$ |
| <b>IgG3C-</b> | $1.4 \times 10^{-10}$ | $5.6 \times 10^{-6}$ | $7.4 \times 10^{-6}$ | $1.5 \times 10^{-7}$ | $9.6 \times 10^{-7}$ | $8.8 \times 10^{-7}$ | $1.8 \times 10^{-7}$ | $1.9 \times 10^{-5}$ | $3.9 \times 10^{-7}$ | $8.2 \times 10^{-6}$ |

Values represent KD ( $M$ ) determined by surface plasmon resonance (SPR) using soluble human or mouse FcγR ectodomains.
