# Supplementary material
Source: PubMed Central journal article supplement (PMC4970321)
Supplement: NIHMS793677-supplement-04.pdf [file NIHMS793677-supplement-04.pdf]

**A**

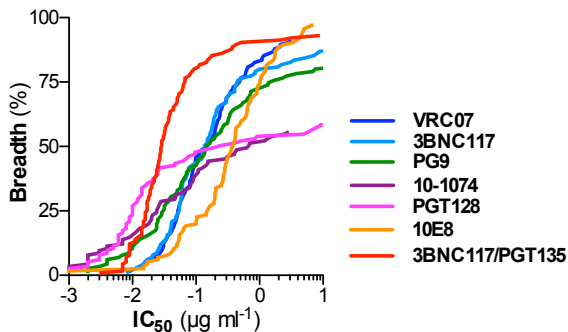

**B**

|           |                            | One bAb        |       |         |       |       |         |        |      |
|-----------|----------------------------|----------------|-------|---------|-------|-------|---------|--------|------|
|           |                            | 3BNC117/PGT135 |       | 3BNC117 | VRC07 | PG9   | 10-1074 | PGT128 | 10E8 |
| % Strains | IC50 <25 $\mu\text{g/ml}$  | 93.0           | 88.7  | 91.3    | 84.3  | 55.7  | 59.1    | 97.4   |      |
|           | IC50 <1 $\mu\text{g/ml}$   | 90.4           | 79.1  | 82.6    | 72.2  | 51.3  | 53.9    | 73.9   |      |
|           | IC50 <0.1 $\mu\text{g/ml}$ | 80.0           | 43.5  | 45.2    | 41.7  | 38.3  | 47.8    | 19.1   |      |
|           | Median IC50                | 0.027          | 0.116 | 0.100   | 0.100 | 0.028 | 0.013   | 0.363  |      |
|           | Geo Mean IC50              | 0.035          | 0.136 | 0.133   | 0.112 | 0.037 | 0.026   | 0.322  |      |

  

|           |                            | Two bAbs       |       |             |                 |              |             |          |              |           |              |            |            |          |             |
|-----------|----------------------------|----------------|-------|-------------|-----------------|--------------|-------------|----------|--------------|-----------|--------------|------------|------------|----------|-------------|
|           |                            | 3BNC117/PGT135 |       | 3BNC117-PG9 | 3BNC117-10-1074 | 3BNC117-10E8 | PG9-10-1074 | PG9-10E8 | 10-1074-10E8 | VRC07-PG9 | VRC07-PGT128 | VRC07-10E8 | PG9-PGT128 | PG9-10E8 | PGT128-10E8 |
| % Strains | IC50 <25 $\mu\text{g/ml}$  | 93.0           | 99.1  | 95.7        | 99.1            | 97.4         | 98.3        | 100.0    | 99.1         | 95.7      | 99.1         | 97.4       | 98.3       | 99.1     |             |
|           | IC50 <1 $\mu\text{g/ml}$   | 90.4           | 96.5  | 91.3        | 95.7            | 93.0         | 93.0        | 87.8     | 97.4         | 92.2      | 96.5         | 92.2       | 94.8       | 90.4     |             |
|           | IC50 <0.1 $\mu\text{g/ml}$ | 80.0           | 75.7  | 69.6        | 68.7            | 73.0         | 73.9        | 54.8     | 68.7         | 71.3      | 69.6         | 77.4       | 76.5       | 58.3     |             |
|           | Median IC50                | 0.027          | 0.034 | 0.031       | 0.047           | 0.020        | 0.036       | 0.065    | 0.037        | 0.031     | 0.047        | 0.017      | 0.035      | 0.049    |             |
|           | Geo Mean IC50              | 0.035          | 0.039 | 0.040       | 0.051           | 0.028        | 0.043       | 0.078    | 0.045        | 0.032     | 0.055        | 0.026      | 0.041      | 0.057    |             |

  

|           |                            | Three bAbs     |       |             |                 |              |             |           | Four bAbs  |              |            |                |                  |                    |
|-----------|----------------------------|----------------|-------|-------------|-----------------|--------------|-------------|-----------|------------|--------------|------------|----------------|------------------|--------------------|
|           |                            | 3BNC117/PGT135 |       | 3BNC117-PG9 | 3BNC117-10-1074 | 3BNC117-10E8 | PG9-10-1074 | VRC07-PG9 | VRC07-10E8 | VRC07-PGT128 | PG9-PGT128 | VRC07-PG9-10E8 | 3BNC117-PG9-10E8 | 3BNC117-PG9-PGT128 |
| % Strains | IC50 <25 $\mu\text{g/ml}$  | 93.0           | 100.0 | 99.1        | 100.0           | 100.0        | 99.1        | 99.1      | 99.1       | 99.1         | 99.1       | 99.1           | 100.0            |                    |
|           | IC50 <1 $\mu\text{g/ml}$   | 90.4           | 98.3  | 99.1        | 97.4            | 100.0        | 98.3        | 99.1      | 99.1       | 99.1         | 99.1       | 99.1           | 100.0            |                    |
|           | IC50 <0.1 $\mu\text{g/ml}$ | 80.0           | 85.2  | 91.3        | 84.3            | 87.0         | 85.2        | 85.2      | 84.3       | 90.4         |            | 94.8           | 93.9             |                    |
|           | Median IC50                | 0.027          | 0.018 | 0.021       | 0.025           | 0.019        | 0.015       | 0.023     | 0.022      | 0.013        |            | 0.010          | 0.014            |                    |
|           | Geo Mean IC50              | 0.035          | 0.021 | 0.022       | 0.026           | 0.019        | 0.020       | 0.023     | 0.022      | 0.016        |            | 0.012          | 0.013            |                    |
