# Supplementary material
Source: PubMed Central journal article supplement (PMC4970321)
Supplement: NIHMS793677-supplement-06.pdf [file NIHMS793677-supplement-06.pdf]

## Supplemental Experimental Procedures

### **Recombinant Protein Expression and Purification**

BiNAbs were generated using previously described approaches (Merchant et al., 1998; Ridgway et al., 1996; Schaefer et al., 2011). For correct heavy-light chain pairing, one of the parental mAbs was expressed in the CrossMab format (CH1-CL swapping), while for the other mAb, the wild-type domain architecture was maintained (Schaefer et al., 2011). For heavy chain heterodimerization, point mutations were introduced in the CH3 domain: Y349C/T366S/L368A/Y407V for the 1<sup>st</sup> mAb; S354C/T366W for the 2<sup>nd</sup> mAb (Merchant et al., 1998; Ridgway et al., 1996). Purification tags were added to the C terminus of each heavy chain (His or *Strep*-TagII) for determining heterodimer formation efficiency. Antibodies, gp140<sup>YU-2</sup>, gp120<sup>YU-2</sup>, and 2CC-core were generated by transient transfection of HEK293T or 293E cells, as previously described (Bournazos et al., 2014). Antibodies were purified using Protein G Sepharose 4 Fast Flow or MabSelect SuRe LX affinity purification media (GE Healthcare); *Strep*-tagged and His-tagged proteins were purified using the *Strep*-Tactin Superflow Plus Resin (Qiagen) and His-Tag isolation and pull-down dynabeads (ThermoFisher), respectively. Purified proteins were dialyzed in PBS and sterile filtered (0.22  $\mu$ m). Purity was assessed by SDS-PAGE and Coomassie staining and was estimated to be >90%. Size exclusion chromatography (SEC) was performed using a Superose 6 Increase 10/300GL column (GE Healthcare) on an Äkta Pure 25 HPLC system. Protein T<sub>m</sub> was determined using the Protein Thermal Shift Dye Kit (ThermoFisher) following manufacturer's instructions on a QuantStudio 12K Flex real-time thermal cycler.

### **In Vitro Neutralization Assay**

*In vitro* neutralization activity of antibodies was assessed against a multiclade panel of HIV-1 envelope pseudoviruses, using previously described protocols (Montefiori, 2005). Neutralization assays were performed by the Collaboration for AIDS Vaccine Discovery (CAVD) core neutralization facility (Harvard University, Boston). IC<sub>50</sub> and IC<sub>80</sub> values reflect the amount of antibody sufficient to reduce luciferase activity (as measured by relative luminescence units (RLU)) by 50% and 80%, respectively. For comparison of the activity of biNAbs with the corresponding parental mAbs, fold change values were calculated by dividing the IC<sub>50</sub> or IC<sub>80</sub> titer of the most potent (lowest IC<sub>50/80</sub>) of the two parental mAbs by the IC<sub>50/80</sub> titer of the biNAb. Predicted neutralization activity of a mix of two mAbs was determined by selecting the lowest IC<sub>50/80</sub> titer of the two mAbs for a given virus. For combinations involving 2 mAbs with non-overlapping epitope specificities, this predicted activity (theoretical IC<sub>50/80</sub>) has been shown to be comparable to the neutralization activity of a 1:1 mAb mix determined experimentally (experimental IC<sub>50/80</sub>) (Kong et al., 2015). Neutralization activity data of human IgG1 mAbs that were used for comparison in this study were obtained from the CATNAP database (<http://www.hiv.lanl.gov/>). For experiments involving the assessment of the *in vitro* neutralization activity of a mix of two bNAbs, antibodies were mixed at a ratio of 1:1 and the final concentration for determining IC<sub>50/80</sub> titers was based on the total IgG concentration of the sample.

### **Anti-gp140 IgG ELISA**

For epitope-specific ELISA, gp140<sup>YU-2</sup>- or 2CC-Core-coated (1  $\mu$ g/ml) microtiter plates (Nunc) were used, as previously described (Bournazos et al., 2014). Briefly, recombinant gp140<sup>YU-2</sup>- or 2CC-Core (1  $\mu$ g/ml) was immobilized into high-binding 96-well microtiter plates (Nunc) and following overnight incubation at 4°C, plates were blocked with PBS + 2% (w/v) BSA + 0.05% (v/v) Tween20 for 2 h. After blocking, plates were incubated for 1 h with IgG antibodies and plate-bound IgG was detected by HRP-conjugated goat anti-human IgG (Fc $\gamma$ -specific, Jackson ImmunoResearch), or goat anti-human kappa or lambda (Bethyl Laboratories). Plates were developed using the TMB (3,3',5,5'-Tetramethylbenzidine) two-component peroxidase substrate

kit (KPL) and reactions stopped with the addition of 1 M phosphoric acid. Absorbance at 450nm was immediately recorded using a SpectraMax Plus spectrophotometer (Molecular Devices) and background absorbance from negative control samples was subtracted. For competition ELISA, binding of biotinylated biNAb (1 µg/ml) to gp140-coated plates was competed with increasing amounts of mAbs, mAb mix (1:1) or biNAb (0.001-100 µg/ml), and detected using HRP-conjugated neutravidin (ThermoFisher). For the quantification of serum concentration of anti-HIV-1 mAbs, goat anti-human IgG (mouse IgG absorbed, Jackson ImmunoResearch)-coated or gp140-coated plates were used (Bournazos et al., 2014). IgG binding was detected using HRP-conjugated goat anti-human IgG (mouse IgG absorbed; Jackson ImmunoResearch), as previously described (Bournazos et al., 2014).

### **Surface Plasmon Resonance (SPR)**

All experiments were performed with a Biacore T200 SPR system (Biacore, GE Healthcare) at 25°C in HBS-EP+ buffer (10 mM HEPES, pH 7.4; 150 mM NaCl; 3.4 mM EDTA; 0.005% (v/v) surfactant P20). For the measurement of the affinity of IgG hinge domain variants for mouse and human FcγRs, IgG antibodies (diluted at 25 µg/ml in 10 mM sodium acetate, pH 4.5) were immobilized on Series S CM5 chips by amine coupling at a density of 1000 RU. Recombinant human or mouse soluble FcγR ectodomains (Sinobiological) were injected through flow cells at a flow rate of 20 µl/min, with the concentration ranging from 15.625 – 2000 nM (1:2 successive dilutions). Association time was 120 s followed by a 300-s dissociation step. At the end of each cycle, sensor surface was regenerated with 50 mM NaOH (50 µl/min, 30 s). Background binding to blank immobilized flow cells was subtracted and affinity constants were calculated using BIAcore T200 evaluation software (GE Healthcare) using the 1:1 Langmuir binding model.

### **Virus Production**

HIV-1<sup>T251-18</sup> was generated by cloning the T251-18 *env* gene (CRF02\_AG; NIH AIDS Reagent program) to the NL4-3 HIV-1 vector backbone and produced by transfection in 293T cells, as previously described (Klein et al., 2012). HIV-1 virus preparations were quantified by p24 ELISA (Lenti-X p24 Rapid Titer Kit, Clontech), following manufacturer's recommendations.

### **In Vivo Experiments**

All *in vivo* experiments were performed in compliance with federal laws and institutional guidelines and have been approved by the Rockefeller University Institutional Animal Care and Use Committee. Humanized NRG (NOD.Cg-*Rag1*<sup>tm1Mom</sup>*Il2rg*<sup>tm1Wjl</sup>/SzJ) mice were generated by intrahepatic human CD34<sup>+</sup> HSCs injection of sublethally irradiated neonatal NRG mice, as previously described (Klein et al., 2012). Mice were screened at 6-8 wk of age for human leukocyte reconstitution by flow cytometry (as described in (Bournazos et al., 2014; Klein et al., 2012)) and mice with a measurable human CD45<sup>+</sup> graft (10-15 weeks, males and females) were infected following i.p. injection of HIV-1<sup>T251-18</sup> (180 ng p24). Viral load was quantified 3 weeks post-infection and mice with viral loads >10<sup>3</sup> copies/ml were included in treatment experiments. Mice were randomly assigned to experimental groups and both groups had comparable baseline average viremia levels. Antibodies (either 1 mg of 3BNC117/PGT135 biNAb or 1 mg 1:1 mix of 3BNC117 (0.5 mg) and PGT135 (0.5mg)) were administered biweekly s.c. for 4 weeks. Each experimental group consisted of 9 mice; a group size previously determined to sufficiently detect response to antibody therapy (Bournazos et al., 2014; Klein et al., 2012). Plasma HIV-1 viral load was determined by quantitative reverse-transcriptase PCR as previously described (Bournazos et al., 2014; Klein et al., 2012). The lower limit of detection for this assay was previously determined to be 800 copies/ml (Klein et al., 2012).

### ***HIV gp120 Sequence Analysis***

Plasma-extracted viral RNA was reverse transcribed using the Superscript III first strand cDNA synthesis kit (Life Technologies) and the gp120 sequence-specific primer 5'-TAGCAATAGTTGTGTGGTCC-3'. Resulting cDNA was used as the template for PCR amplification using the following primer pairs: 5'-TAGCAATAGTTGTGTGGTCC-3' and 5'-ATTGCTCTGCTGTTGCACTATAC-3'. Products from this PCR reaction were subjected to a second PCR round using the following nested primer pairs: 5'-AGAAAGAGCAGAAGACAGTGGC-3' and 5'-TACCGTCAGCGTCATTGACGC-3'. All PCR reactions were performed using the Platinum *Taq* High Fidelity DNA polymerase (ThermoFisher) and PCR amplicons were ligated into pCR4-TOPO vectors. Inserts from individual colonies were sequenced (Genewiz) using M13F (5'-TGTAACGACGGCCAGT-3'), M13R (5'-CAGGAAACAGCTATGAC-3'), and gp120-specific primers (5'-GTCTGGGCTACACATGCCTGC-3'; 5'-CCATGCAAAAATGTCAGCACA-3'; 5'-GATGATATAACTCTCCAATGCAG-3'). Sequence reads were aligned to gp120<sup>T251-18</sup> and mutations were numbered using HXBc2 numbering. To determine the presence of mutations within the gp120 ORF following bNAbs therapy, virus gp120 was cloned from each mouse from plasma-extracted viral RNA obtained at the last experimental time point. Non-synonymous mutations present in the majority (>50%) of the analyzed clones (6-8 clones/mouse) were defined as recurrent mutations. Mice with evidence for recurrent mutations were further analyzed to determine viral gp120 sequence at baseline (i.e. prior to treatment initiation) to assess whether the observed mutations emerged following antibody treatment.

# Supplemental Tables

**Table S1:** Comparison of the *in vitro* neutralization activity of human IgG1 3BNC117 and 10-1074 mAbs and 3BNC117/10-1074 biNAb. **Related to Figure 1.**

| Virus ID              | Clade   | 3BNC117 | 10-1074 | 3BNC117 /10-1074 | log Fold Change | Virus ID        | Clade          | 3BNC117      | 10-1074      | 3BNC117 /10-1074 | log Fold Change |
|-----------------------|---------|---------|---------|------------------|-----------------|-----------------|----------------|--------------|--------------|------------------|-----------------|
| 6535.3                | B       | 0.303   | 0.013   | 0.083            | -0.805          | Q769.d22        | A              | 0.008        | >20          | 0.028            | -0.524          |
| QH0692.42             | B       | 0.238   | 0.073   | 0.282            | -0.587          | Q259.d2.17      | A              | 0.016        | 11.912       | 0.359            | -1.357          |
| SC422661.8            | B       | 0.045   | 0.072   | 0.108            | -0.381          | Q842.d12        | A              | 0.002        | 12.812       | 0.019            | -0.899          |
| PVO.4                 | B       | 0.076   | 0.074   | 0.067            | 0.043           | Q260.v5.c36     | A              | 0.200        | 0.201        | 0.312            | -0.193          |
| TRO.11                | B       | 0.062   | 0.014   | 0.060            | -0.632          | 3415.v1.c1      | A              | 0.115        | >20          | 0.224            | -0.224          |
| AC10.0.29             | B       | 7.028   | 0.037   | 0.248            | -0.826          | 3365.v2.c2      | A              | 0.015        | 0.160        | 0.066            | -0.633          |
| RHPA4259.7            | B       | 0.026   | 0.049   | 0.030            | -0.059          | 191955_A11      | A (T/F)        | >20          | >20          | >20              | ND              |
| THRO4156.18           | B       | 2.552   | >20     | 7.226            | -0.452          | 191084_B7-19    | A (T/F)        | 0.070        | 0.067        | 0.121            | -0.327          |
| REJO4541.67           | B       | 0.030   | >20     | 0.129            | -0.635          | 9004SS_A3_4     | A (T/F)        | 0.070        | 0.015        | 0.068            | -0.656          |
| TRJO4551.58           | B       | 0.059   | 0.459   | 0.270            | -0.661          | T257-31         | CRF02_AG       | 0.125        | >20          | 0.369            | -0.469          |
| WITO4160.33           | B       | 0.024   | 0.139   | 0.066            | -0.438          | 928-28          | CRF02_AG       | 0.153        | 1.911        | 0.424            | -0.442          |
| CAAN5342.A2           | B       | 0.612   | 0.014   | 0.115            | -0.915          | 263-8           | CRF02_AG       | 0.028        | 0.793        | 0.053            | -0.276          |
| YU2.DG                | B       | 0.034   | 0.110   | 0.037            | -0.038          | T250-4          | CRF02_AG       | >20          | 0.002        | 0.040            | -1.301          |
| WEAU_d15_410_787      | B (T/F) | 0.050   | 0.035   | 0.107            | -0.485          | T251-18         | CRF02_AG       | 0.220        | 1.011        | 0.455            | -0.315          |
| 1006_11_C3_1601       | B (T/F) | 0.030   | 0.001   | 0.018            | -1.255          | T278-50         | CRF02_AG       | >20          | 7.477        | >20              | -0.427          |
| 1054_07_TC4_1499      | B (T/F) | 0.070   | 0.113   | 0.177            | -0.403          | T255-34         | CRF02_AG       | 0.037        | >20          | 0.186            | -0.697          |
| 1056_10_TA11_1826     | B (T/F) | 0.300   | 0.072   | 0.240            | -0.523          | 211-9           | CRF02_AG       | 0.350        | 0.203        | 0.680            | -0.525          |
| 1012_11_TC21_3257     | B (T/F) | 0.020   | 0.023   | 0.029            | -0.161          | 235-47          | CRF02_AG       | 0.024        | 0.092        | 0.114            | -0.670          |
| 6240_08_TA5_4622      | B (T/F) | 0.330   | 0.087   | 0.225            | -0.413          | 620345.c01      | CRF01_AE       | >20          | >20          | >20              | ND              |
| 6244_13_B5_4576       | B (T/F) | 0.040   | 0.197   | 0.107            | -0.427          | CNE8            | CRF01_AE       | 0.026        | >20          | 0.406            | -1.194          |
| 62357_14_D3_4589      | B (T/F) | 0.060   | >20     | 0.120            | -0.301          | C1080.c03       | CRF01_AE       | 0.123        | >20          | 0.400            | -0.511          |
| SC05_8C11_2344        | B (T/F) | 0.150   | 0.037   | 0.178            | -0.682          | R2184.c04       | CRF01_AE       | 0.033        | >20          | 0.062            | -0.271          |
| Du156.12              | C       | 0.032   | 0.014   | 0.059            | -0.625          | R1166.c01       | CRF01_AE       | 0.208        | >20          | 0.354            | -0.231          |
| Du172.17              | C       | 0.263   | 0.087   | 0.344            | -0.597          | R3265.c06       | CRF01_AE       | 0.058        | >20          | 3.613            | -1.797          |
| Du422.1               | C       | >20     | 0.082   | 0.964            | -1.070          | C2101.c01       | CRF01_AE       | 0.059        | >20          | 0.131            | -0.347          |
| ZM197M.PB7            | C       | 0.354   | >20     | 1.185            | -0.525          | C3347.c11       | CRF01_AE       | 0.029        | >20          | 0.077            | -0.419          |
| ZM214M.PL15           | C       | 0.082   | 0.590   | 0.299            | -0.562          | C4118.c09       | CRF01_AE       | 0.032        | >20          | 0.462            | -1.161          |
| ZM233M.PB6            | C       | 0.181   | 0.095   | 0.314            | -0.519          | CNE5            | CRF01_AE       | 0.347        | >20          | 1.950            | -0.750          |
| ZM249M.PL1            | C       | 0.037   | >20     | 0.224            | -0.780          | BJOX009000.02.4 | CRF01_AE       | 0.400        | >20          | 2.557            | -0.806          |
| ZM53M.PB12            | C       | 0.212   | >20     | 0.811            | -0.584          | BJOX015000.11.5 | CRF01_AE (T/F) | 0.050        | >20          | 0.589            | -1.071          |
| ZM109F.PB4            | C       | 0.052   | >20     | 2.252            | -1.635          | BJOX010000.06.2 | CRF01_AE (T/F) | 1.580        | >20          | 12.713           | -0.906          |
| ZM135M.PL10a          | C       | 0.058   | 0.146   | 0.183            | -0.502          | BJOX025000.01.1 | CRF01_AE (T/F) | 0.050        | >20          | 0.286            | -0.757          |
| CAP45.2.00.G3         | C       | 1.399   | >20     | >20              | -1.155          | BJOX028000.10.3 | CRF01_AE (T/F) | 0.010        | >20          | 0.044            | -0.643          |
| CAP210.2.00.E8        | C       | 9.713   | >20     | >20              | -0.314          | X1193_c1        | G              | 0.060        | 0.091        | 0.181            | -0.480          |
| HIV-001428-2.42       | C       | 0.017   | 0.055   | 0.029            | -0.229          | P0402_c2_11     | G              | 0.060        | 0.011        | 0.036            | -0.515          |
| HIV-0013095-2.11      | C       | 0.243   | >20     | 4.045            | -1.222          | X1254_c3        | G              | 0.080        | 0.162        | 0.320            | -0.602          |
| HIV-16055-2.3         | C       | 3.888   | >20     | >20              | -0.711          | X2088_c9        | G              | >20          | 0.004        | 0.126            | -1.498          |
| HIV-16845-2.22        | C       | >20     | 1.930   | 4.447            | -0.363          | X2131_C1_B5     | G              | 0.430        | 0.023        | 0.171            | -0.871          |
| Ce1086_B2             | C (T/F) | 0.090   | >50     | 1.722            | -1.282          | P1981_C5_3      | G              | 0.740        | 0.005        | 0.077            | -1.188          |
| Ce0393_C3             | C (T/F) | 0.200   | >50     | 0.916            | -0.661          | X1632_S2_B10    | G              | 15.690       | >20          | >20              | -0.105          |
| Ce1176_A3             | C (T/F) | 0.220   | 0.022   | 0.211            | -0.982          | 3016.v5.c45     | D              | 0.834        | >20          | 17.306           | -1.317          |
| Ce2010_F5             | C (T/F) | 0.050   | >20     | 0.288            | -0.760          | A07412M1.vrc12  | D              | 0.020        | 0.014        | 0.104            | -0.871          |
| Ce0682_E4             | C (T/F) | 0.030   | >20     | 0.077            | -0.409          | Z31965.c01      | D              | 0.039        | >20          | 0.275            | -0.844          |
| Ce1172_H1             | C (T/F) | >20     | 0.022   | 0.454            | -1.315          | Z31966.c02      | D              | 0.290        | >20          | 4.740            | -1.213          |
| Ce2060_G9             | C (T/F) | 0.240   | >20     | 0.359            | -0.175          | 191821_E6_1     | D (T/F)        | 0.090        | >20          | 0.902            | -1.001          |
| Ce703010054_2A2       | C (T/F) | 0.370   | >20     | 1.710            | -0.665          | 3817.v2.c59     | CD             | 0.191        | 1.151        | 0.916            | -0.680          |
| BF1266.431a           | C (T/F) | 0.030   | >20     | 0.358            | -1.077          | 6480.v4.c25     | CD             | 0.010        | 0.005        | 0.034            | -0.833          |
| 246F_C1G              | C (T/F) | 19.320  | 0.055   | 0.640            | -1.066          | 6952.v1.c20     | CD             | 0.150        | 0.030        | 0.251            | -0.923          |
| 249M_B10              | C (T/F) | 0.100   | >20     | 0.355            | -0.550          | 6811.v7.c18     | CD             | 0.030        | 0.002        | 0.029            | -1.161          |
| ZM247v1(Rev-)         | C (T/F) | >20     | 0.060   | 1.538            | -1.409          | 89-F1_2_25      | CD             | >20          | >20          | >20              | ND              |
| 7030102001E5(Rev-)    | C (T/F) | 0.290   | 0.010   | 0.127            | -1.104          | 3301.v1.c24     | AC             | 0.028        | 0.020        | 0.066            | -0.519          |
| 1394C9G1(Rev-)        | C (T/F) | >20     | 0.038   | 0.592            | -1.193          | 6041.v3.c23     | AC             | 0.010        | >20          | 0.197            | -1.294          |
| Ce704809221_1B3       | C (T/F) | 0.080   | 0.102   | 0.357            | -0.650          | 6540.v4.c1      | AC             | >20          | >20          | >20              | ND              |
| CNE19                 | BC      | 0.020   | 0.344   | 0.124            | -0.792          | 6545.v4.c1      | AC             | >20          | >20          | >20              | ND              |
| CNE20                 | BC      | >20     | 0.001   | 0.054            | -1.732          | 0815.v3.c3      | ACD            | 0.015        | 0.088        | 0.029            | -0.292          |
| CNE21                 | BC      | >20     | 0.049   | 0.548            | -1.049          | 6103.v3.c10     | ACD            | 0.220        | 0.041        | 0.265            | -0.810          |
| CNE17                 | BC      | 5.760   | 1.993   | 3.337            | -0.224          |                 |                |              |              |                  |                 |
| CNE30                 | BC      | 0.280   | 0.353   | 0.772            | -0.440          |                 |                |              |              |                  |                 |
| CNE52                 | BC      | 0.020   | 1.711   | 0.174            | -0.940          |                 |                |              |              |                  |                 |
| CNE53                 | BC      | 0.059   | 0.023   | 0.128            | -0.745          |                 |                |              |              |                  |                 |
| CNE58                 | BC      | 0.336   | 0.137   | 0.364            | -0.424          |                 |                |              |              |                  |                 |
| MS208_A1              | A       | 0.016   | >20     | 0.200            | -1.092          |                 |                |              |              |                  |                 |
| Q23_17                | A       | 0.016   | 0.006   | 0.020            | -0.523          |                 |                |              |              |                  |                 |
| Q461.e2               | A       | 0.059   | >20     | 0.167            | -0.455          |                 |                |              |              |                  |                 |
| <b>Total Viruses</b>  |         |         |         |                  |                 |                 |                | <b>120</b>   | <b>120</b>   | <b>120</b>       |                 |
| <b>%Breadth</b>       |         |         |         |                  |                 |                 |                | <b>87.5</b>  | <b>58.3</b>  | <b>91.7</b>      |                 |
| <b>Geometric mean</b> |         |         |         |                  |                 |                 |                | <b>0.103</b> | <b>0.071</b> | <b>0.242</b>     |                 |

*In vitro* neutralization activity was determined by standardized TZM-bl assay. IC<sub>50</sub> values are expressed as µg/ml. Fold change values were calculated by dividing the IC<sub>50</sub> titer of the most potent (lowest IC<sub>50</sub>) of the two parental mAbs (3BNC117 or 10-1074) by the IC<sub>50</sub> titer of the biNAb (3BNC117/10-1074). ND: not determined

**Table S2:** Comparison of the *in vitro* neutralization activity of human IgG1 PG16 and PGT121 mAbs and PG16/PGT121 bInAb. **Related to Figure 2.**

| Virus ID           | Clade   | PG16   | PGT121 | PG16/<br>PGT121 | log Fold<br>Change | Virus ID                   | Clade          | PG16         | PGT121 | PG16/<br>PGT121 | log Fold<br>Change |
|--------------------|---------|--------|--------|-----------------|--------------------|----------------------------|----------------|--------------|--------|-----------------|--------------------|
| 6535.3             | B       | 0.653  | 0.008  | 1.333           | -2.222             | MS208.A1                   | A              | 0.002        | >50    | 0.052           | -1.415             |
| QH0692.42          | B       | >50    | 1.041  | >40             | -1.585             | Q23.17                     | A              | 0.008        | 0.01   | 0.001           | 0.903              |
| SC422661.8         | B       | 0.858  | 0.101  | 14.791          | -2.166             | Q461.e2                    | A              | 1.755        | >50    | 5.863           | -0.524             |
| PVO.4              | B       | 15.272 | 0.131  | 6.705           | -1.709             | Q769.d22                   | A              | 0.005        | >50    | 0.176           | -1.547             |
| TRO.11             | B       | 1.922  | 0.005  | 0.699           | -2.146             | Q259.d2.17                 | A              | 0.065        | 8.99   | 0.224           | -0.537             |
| AC10.0.29          | B       | 0.023  | 0.037  | 0.055           | -0.379             | Q842.d12                   | A              | 0.032        | 0.023  | 0.023           | 0.000              |
| RHPA4259.7         | B       | 0.375  | 0.014  | 1.303           | -1.969             | 0260.v5.c36                | A              | 1.538        | 0.054  | 0.817           | -1.180             |
| THRO4156.18        | B       | 6.825  | >50    | 10.836          | -0.201             | 191955_A11                 | A (T/F)        | 0.009        | >50    | 0.022           | -0.388             |
| REJO4541.67        | B       | 0.039  | 3.607  | 0.091           | -0.368             | 191084_B7_19               | A (T/F)        | 0.024        | 0.042  | 0.034           | -0.151             |
| TRJO4551.58        | B       | 1.008  | 3.728  | 4.837           | -0.681             | 9004SS_A3_4                | A (T/F)        | 0.020        | 0.008  | 0.026           | -0.512             |
| WITO4160.33        | B       | 0.002  | 0.459  | 0.007           | -0.544             | T257-31                    | CRF02_AG       | 0.007        | >50    | 0.017           | -0.385             |
| CAANS342.A2        | B       | 1.831  | 0.011  | 2.507           | -2.358             | 928-28                     | CRF02_AG       | 0.034        | >50    | 0.090           | -0.423             |
| YU2.DG             | B       | 0.055  | 0.047  | 0.414           | -0.946             | 263-8                      | CRF02_AG       | 0.347        | 3.347  | 0.531           | -0.185             |
| BaL_26             | B       | 0.163  | 0.014  | 3.266           | -2.353             | T250-4                     | CRF02_AG       | 0.002        | 0.001  | 0.004           | -0.602             |
| WEAU_d15_410_787   | B (T/F) | 0.435  | 0.083  | 1.032           | -1.095             | T251-18                    | CRF02_AG       | 1.721        | 17.702 | 11.345          | -0.819             |
| 1006_11_C3_1601    | B (T/F) | >50    | 0.008  | 1.196           | -2.175             | T275-30                    | CRF02_AG       | 0.227        | >50    | 6.072           | -1.427             |
| 1054_07_TC4_1499   | B (T/F) | >50    | 0.115  | >40             | 0.782              | T255-34                    | CRF02_AG       | 0.024        | 6.725  | 0.037           | -0.188             |
| 1056_10_TA11_1826  | B (T/F) | 0.315  | 0.066  | 1.219           | -1.266             | 211-9                      | CRF02_AG       | 0.029        | 1.455  | 0.027           | 0.031              |
| 1012_11_TC21_3257  | B (T/F) | 0.030  | 0.008  | 0.094           | -1.070             | 235-47                     | CRF02_AG       | 0.092        | 0.332  | 1.039           | -1.053             |
| 6240_08_TA5_4622   | B (T/F) | >50    | 0.128  | 18.289          | -2.155             | 620345.c01                 | CRF01_AE       | >50          | >50    | >50             | ND                 |
| 6244_13_B5_4576    | B (T/F) | >50    | 0.249  | >40             | -2.206             | C1080.c03                  | CRF01_AE       | 0.001        | >50    | 0.002           | -0.301             |
| 62357_14_D3_4589   | B (T/F) | >50    | 1.036  | >40             | -1.587             | R2184.c04                  | CRF01_AE       | 0.670        | >50    | 5.155           | -0.886             |
| SC05_8C11_2344     | B (T/F) | 0.070  | 0.093  | 0.624           | -0.950             | R1166.c01                  | CRF01_AE       | 0.280        | >50    | 4.583           | -1.214             |
| Du156.12           | C       | 0.006  | 0.007  | 0.029           | -0.684             | R3265.c06                  | CRF01_AE       | 0.016        | >50    | 0.052           | -0.512             |
| Du172.17           | C       | 0.033  | 0.115  | 0.082           | -0.395             | C2101.c01                  | CRF01_AE       | 0.012        | >50    | 0.012           | 0.000              |
| Du422.1            | C       | 0.261  | 0.029  | 0.096           | -0.520             | C3347.c11                  | CRF01_AE       | 0.008        | >50    | 0.019           | -0.376             |
| ZM197M.PB7         | C       | 1.496  | >50    | 0.592           | 0.403              | C4118.c09                  | CRF01_AE       | 0.022        | >50    | 0.040           | -0.260             |
| ZM214M.PL15        | C       | >50    | 0.236  | >40             | -2.229             | CNE5                       | CRF01_AE       | 0.008        | >50    | 0.004           | 0.301              |
| ZM233M.PB6         | C       | 0.002  | 1.451  | 0.002           | 0.000              | BJOX009000.02.4            | CRF01_AE       | 1.188        | 3.626  | 2.032           | -0.233             |
| ZM249M.PL1         | C       | 0.127  | >50    | 0.049           | 0.414              | CNE55                      | CRF01_AE       | 1.006        | >50    | 15.160          | -1.178             |
| ZM53M.PB12         | C       | 0.007  | 0.001  | 0.011           | -1.041             | BJOX015000.11.5            | CRF01_AE (T/F) | 3.129        | >50    | 10.879          | -0.541             |
| ZM109F.PB4         | C       | 7.033  | 7.894  | >40             | -0.755             | BJOX010000.06.2            | CRF01_AE (T/F) | 1.202        | >50    | 10.276          | -0.932             |
| ZM135M.PL10a       | C       | >50    | 0.576  | 17.298          | -1.478             | BJOX025000.01.1            | CRF01_AE (T/F) | 0.071        | >50    | 0.271           | -0.582             |
| CAP45.2.00.G3      | C       | 0.001  | 0.083  | 0.001           | 0.000              | X1193_c1                   | G              | 0.018        | 0.045  | 0.028           | -0.192             |
| CAP210.2.00.E8     | C       | 0.010  | 5.082  | 0.242           | -1.384             | P0402_c2_11                | G              | 0.025        | 0.02   | 0.914           | -1.660             |
| HIV-001428-2.42    | C       | 0.039  | 0.026  | 0.001           | 1.415              | X2088_c9                   | G              | >50          | 0.011  | 7.752           | -2.848             |
| HIV-0013095-2.11   | C       | 0.002  | >50    | 0.019           | -0.978             | X2131_C1_B5                | G              | 0.024        | 0.015  | 0.042           | -0.447             |
| HIV-16055-2.3      | C       | 0.17   | 0.444  | 0.008           | 1.327              | P1981_C5_3                 | G              | 0.376        | 0.004  | 0.348           | -1.940             |
| HIV-16845-2.22     | C       | 3.126  | 12.685 | 9.374           | -0.477             | X1632_S2_B10               | G              | 0.012        | >50    | 0.063           | -0.720             |
| Ce1086_B2          | C (T/F) | >50    | 0.001  | 1.274           | -3.105             | 3016.v5.c45                | D              | >50          | >50    | >50             | ND                 |
| Ce0393_C3          | C (T/F) | 0.002  | >50    | 0.006           | -0.477             | A07412M1.vrc12             | D              | 0.343        | 0.001  | 1.958           | -3.292             |
| Ce1176_A3          | C (T/F) | 0.003  | 0.017  | 0.009           | -0.477             | 231965.c01                 | D              | 1.438        | >50    | 0.540           | 0.425              |
| Ce0682_E4          | C (T/F) | 0.026  | >50    | 0.051           | -0.293             | 231966.c02                 | D              | 0.007        | >50    | 0.024           | -0.535             |
| Ce1172_H1          | C (T/F) | 0.007  | 0.023  | 0.021           | -0.477             | 191821_E6_1                | D (T/F)        | 9.600        | >50    | >40             | -0.620             |
| Ce2060_G9          | C (T/F) | 0.075  | >50    | 0.398           | -0.725             | 3817.v2.c59                | CD             | 0.008        | >50    | 0.011           | -0.138             |
| Ce703010054_2A2    | C (T/F) | 0.008  | >50    | 0.036           | -0.653             | 6480.v4.c25                | CD             | >50          | 0.017  | 1.846           | -2.036             |
| BF1266.431a        | C (T/F) | 0.003  | >50    | 0.004           | -0.125             | 6952.v1.c20                | CD             | 21.865       | 0.085  | 1.797           | -1.325             |
| 246F_C1G           | C (T/F) | >50    | 0.083  | 37.288          | -2.652             | 6811.v7.c18                | CD             | >50          | 0.004  | 1.227           | -2.487             |
| 249M_B10           | C (T/F) | 0.026  | >50    | 0.052           | -0.301             | 89-F1_2_25                 | CD             | 47.612       | >50    | >40             | 0.076              |
| ZM247v1(Rev-)      | C (T/F) | 0.016  | 0.027  | 0.038           | -0.376             | 3301.v1.c24                | AC             | 0.020        | 0.014  | 0.030           | -0.331             |
| 7030102001E5(Rev-) | C (T/F) | >50    | 0.01   | 4.466           | -2.650             | 6041.v3.c23                | AC             | 0.048        | >50    | 0.050           | -0.018             |
| 1394C9G1(Rev-)     | C (T/F) | 0.008  | 0.486  | 0.040           | -0.699             | 6540.v4.c1                 | AC             | 0.035        | >50    | 0.030           | 0.067              |
| Ce704809221_1B3    | C (T/F) | 0.021  | 0.098  | 0.033           | -0.196             | 6545.v4.c1                 | AC             | 0.044        | >50    | 0.205           | -0.668             |
| CNE19              | BC      | 0.024  | 0.018  | 0.057           | -0.501             | 0815.v3.c3                 | ACD            | >50          | 0.022  | 15.225          | -2.840             |
| CNE20              | BC      | 3.633  | 0.002  | 0.429           | -2.331             | 3103.v3.c10                | ACD            | 25.391       | 0.042  | 7.101           | -2.228             |
| CNE21              | BC      | 0.007  | 0.02   | 0.051           | -0.862             | <b>Total Viruses</b>       |                |              |        |                 |                    |
| CNE17              | BC      | 0.029  | 45.289 | 0.060           | -0.316             | <b>116</b>                 | <b>116</b>     | <b>116</b>   |        |                 |                    |
| CNE30              | BC      | >50    | 0.101  | 31.101          | -2.488             | <b>%Breadth</b>            |                |              |        |                 |                    |
| CNE52              | BC      | 0.009  | 3.741  | 0.042           | -0.669             | <b>82.8</b>                | <b>63.8</b>    | <b>91.4</b>  |        |                 |                    |
| CNE53              | BC      | >50    | 0.055  | 3.604           | -1.816             | <b>Geometric mean IC50</b> |                |              |        |                 |                    |
| CNE58              | BC      | 0.044  | >50    | 0.033           | 0.125              | <b>0.073</b>               | <b>0.083</b>   | <b>0.207</b> |        |                 |                    |

*In vitro* neutralization activity was determined by standardized TZM-bl assay.  
IC<sub>50</sub> values are expressed as µg/ml.  
Fold change values were calculated by dividing the IC<sub>50</sub> titer of the most potent (lowest IC<sub>50</sub>) of the two parental mAbs (PG16 or PGT121) by the IC<sub>50</sub> titer of the bInAb (PG16/PGT121).  
ND: not determined

**Table S3:** Comparison of the *in vitro* neutralization activity of human IgG1 PG16 and PGT128 mAbs and PG16/PGT128 biNAb. **Related to Figure 2.**

| Virus ID           | Clade   | PG16   | PGT128 | PG16/<br>PGT128 | log Fold<br>Change | Virus ID                   | Clade          | PG16         | PGT128       | PG16/<br>PGT128 | log Fold<br>Change |
|--------------------|---------|--------|--------|-----------------|--------------------|----------------------------|----------------|--------------|--------------|-----------------|--------------------|
| 6535.3             | B       | 0.653  | 0.004  | 1.288           | -2.508             | Q23.17                     | A              | 0.008        | 0.009        | 0.001           | 0.863              |
| QH0692.42          | B       | >50    | 0.029  | >40             | -3.140             | Q461.e2                    | A              | 1.755        | >50          | 7.703           | -0.642             |
| SC422661.8         | B       | 0.858  | 1.078  | >40             | -1.669             | Q769.d22                   | A              | 0.005        | >50          | 0.135           | -1.431             |
| PVO.4              | B       | 15.272 | 0.011  | 1.820           | -2.219             | Q259.d2.17                 | A              | 0.065        | >50          | 0.213           | -0.515             |
| TRO.11             | B       | 1.922  | 0.019  | 0.646           | -1.531             | Q842.d12                   | A              | 0.032        | 0.008        | 0.023           | -0.459             |
| AC10.0.29          | B       | 0.023  | 0.008  | 0.040           | -0.699             | 0260.v5.c36                | A              | 1.538        | 0.058        | 0.635           | -1.039             |
| RHPA4259.7         | B       | 0.375  | 0.026  | 0.922           | -1.550             | 0330.v4.c3                 | A              | 0.005        | 1.604        | 0.014           | -0.447             |
| THRO4156.18        | B       | 6.825  | >50    | 15.441          | -0.355             | 191955_A11                 | A (T/F)        | 0.009        | 14.195       | 0.029           | -0.508             |
| TRJO4541.67        | B       | 0.039  | >50    | 0.027           | 0.160              | 191084_B7-19               | A (T/F)        | 0.024        | 0.022        | 0.032           | -0.163             |
| TRJO4551.58        | B       | 1.008  | 0.018  | 0.356           | -1.296             | 9004SS_A3_4                | A (T/F)        | 0.020        | 0.002        | 0.035           | -1.243             |
| WIT04160.33        | B       | 0.002  | >50    | 0.006           | -0.477             | T257-31                    | CRF02_AG       | 0.007        | >50          | 0.019           | -0.434             |
| CAAN5342_A2        | B       | 1.831  | 0.514  | 5.701           | -1.045             | 928-28                     | CRF02_AG       | 0.034        | >50          | 0.111           | -0.514             |
| YU2.DG             | B       | 0.055  | 0.030  | 0.350           | -1.074             | 263-8                      | CRF02_AG       | 0.347        | 0.342        | 0.323           | 0.025              |
| BaL_26             | B       | 0.163  | 0.021  | 4.691           | -2.349             | T250-4                     | CRF02_AG       | 0.002        | 0.001        | 0.002           | -0.301             |
| WEAU_d15_410_787   | B (T/F) | 0.435  | 0.032  | 2.310           | -1.858             | T251-18                    | CRF02_AG       | 1.721        | >50          | 12.683          | -0.867             |
| 1006_11_C3_1601    | B (T/F) | >50    | 0.011  | 6.400           | -2.765             | T278-50                    | CRF02_AG       | 0.227        | 0.031        | 3.104           | -2.001             |
| 1054_07_TC4_1499   | B (T/F) | >50    | 0.035  | >40             | -3.058             | T255-34                    | CRF02_AG       | 0.024        | >50          | 0.051           | -0.327             |
| 1056_10_TA11_1826  | B (T/F) | 0.315  | 0.001  | 0.42            | -2.823             | 211-9                      | CRF02_AG       | 0.029        | 0.062        | 0.033           | -0.056             |
| 1012_11_TC21_3257  | B (T/F) | 0.030  | 0.011  | 0.094           | -0.932             | 235-47                     | CRF02_AG       | 0.092        | >50          | 1.006           | -1.039             |
| 6240_08_TA5_4622   | B (T/F) | >50    | 0.019  | 12.085          | -2.803             | 620345.c01                 | CRF01_AE       | >50          | >50          | >50             | ND                 |
| 6244_13_B5_4576    | B (T/F) | >50    | 0.020  | 12.702          | -2.803             | C1080.c03                  | CRF01_AE       | 0.001        | 0.283        | 0.003           | -0.477             |
| 62357_14_D3_4589   | B (T/F) | >50    | 1.144  | >40             | -1.544             | R2184.c04                  | CRF01_AE       | 0.670        | 20.056       | 1.738           | -0.414             |
| SC05_8C11_2344     | B (T/F) | 0.070  | 0.017  | 0.502           | -1.470             | R1166.c01                  | CRF01_AE       | 0.280        | >50          | 5.646           | -1.305             |
| Du156.12           | C       | 0.006  | 0.017  | 0.035           | -0.766             | R3265.c06                  | CRF01_AE       | 0.016        | >50          | 0.079           | -0.694             |
| Du172.17           | C       | 0.033  | 0.028  | 0.096           | -0.535             | C2101.c01                  | CRF01_AE       | 0.012        | >50          | 0.020           | -0.222             |
| Du422.1            | C       | 0.261  | 0.039  | 0.081           | -0.317             | C3347.c11                  | CRF01_AE       | 0.008        | 0.001        | 0.015           | -1.176             |
| ZM197M.PB7         | C       | 1.496  | >50    | 0.574           | 0.416              | C4118.c09                  | CRF01_AE       | 0.022        | >50          | 0.030           | -0.135             |
| ZM214M.PL15        | C       | >50    | 1.498  | >40             | -1.427             | CNE5                       | CRF01_AE       | 0.008        | 0.018        | 0.004           | 0.301              |
| ZM233M.PB6         | C       | 0.002  | >50    | 0.006           | -0.477             | BJOX009000.02.4            | CRF01_AE       | 1.188        | 0.001        | 0.721           | -2.858             |
| ZM249M.PL1         | C       | 0.127  | 39.657 | 0.040           | 0.502              | CNE55                      | CRF01_AE       | 1.006        | >50          | 24.829          | -1.392             |
| ZM53M.PB12         | C       | 0.007  | >50    | 0.018           | -0.410             | BJOX015000.11.5            | CRF01_AE (T/F) | 3.129        | 0.001        | 0.591           | -2.772             |
| ZM109F.PB4         | C       | 7.033  | >50    | >40             | -0.755             | BJOX010000.06.2            | CRF01_AE (T/F) | 1.202        | 4.817        | 2.695           | -0.351             |
| ZM135M.PL10a       | C       | >50    | >50    | >50             | ND                 | BJOX025000.01.1            | CRF01_AE (T/F) | 0.071        | >50          | 0.086           | -0.083             |
| CAP45.2.00.G3      | C       | 0.001  | >50    | 0.002           | -0.301             | BJOX028000.10.3            | CRF01_AE (T/F) | >50          | 0.024        | 1.159           | -1.684             |
| CAP210.2.00.E8     | C       | 0.010  | >50    | 0.186           | -1.270             | X1193_c1                   | G              | 0.018        | >50          | 0.041           | -0.358             |
| HIV-001428-2.42    | C       | 0.039  | 0.026  | 0.002           | 1.114              | P0402_c2_11                | G              | 0.025        | 0.007        | 1.352           | -2.286             |
| HIV-0013095-2.11   | C       | 0.002  | >50    | 0.024           | -1.079             | X1254_c3                   | G              | 0.023        | >50          | 0.183           | -0.901             |
| HIV-16055-2.3      | C       | 0.17   | >50    | 0.013           | 1.117              | X2131_C1_B5                | G              | 0.024        | >50          | 0.039           | -0.211             |
| HIV-16845-2.22     | C       | 3.126  | 0.181  | 5.096           | -1.450             | P1981_C5_3                 | G              | 0.376        | 0.019        | 0.544           | -1.457             |
| Ce0393_C3          | C (T/F) | 0.002  | >50    | 0.009           | -0.653             | X1632_S2_B10               | G              | 0.012        | >50          | 0.074           | -0.790             |
| Ce1176_A3          | C (T/F) | 0.003  | 0.009  | 0.011           | -0.564             | 3016.v5.c45                | D              | >50          | >50          | >50             | ND                 |
| Ce0682_E4          | C (T/F) | 0.026  | >50    | 0.080           | -0.488             | A07412M1.vrc12             | D              | 0.343        | >50          | 2.317           | -0.830             |
| Ce1172_H1          | C (T/F) | 0.007  | 0.013  | 0.033           | -0.673             | 231965.c01                 | D              | 1.438        | >50          | 0.356           | 0.606              |
| Ce2060_G9          | C (T/F) | 0.075  | >50    | 0.404           | -0.731             | 231966.c02                 | D              | 0.007        | 3.197        | 0.030           | -0.632             |
| Ce703010054_2A2    | C (T/F) | 0.008  | >50    | 0.029           | -0.559             | 191821_E6_1                | D (T/F)        | 9.6          | 0.010        | 12.670          | -3.110             |
| BF1266.431a        | C (T/F) | 0.003  | >50    | 0.006           | -0.301             | 3817_v2.c59                | CD             | 0.008        | 0.003        | 0.013           | -0.637             |
| 246F_C1G           | C (T/F) | >50    | 0.005  | >40             | -3.903             | 6480.v4.c25                | CD             | >50          | 0.003        | 7.987           | -3.425             |
| 249M_B10           | C (T/F) | 0.026  | 7.868  | 0.041           | -0.198             | 6952.v1.c20                | CD             | 21.865       | >50          | 36.091          | -0.218             |
| ZM247v1(Rev-)      | C (T/F) | 0.016  | 0.021  | 0.035           | -0.340             | 6811.v7.c18                | CD             | >50          | 0.003        | >40             | -4.125             |
| 7030102001E5(Rev-) | C (T/F) | >50    | 0.007  | >40             | -3.757             | 89-F1_2_25                 | CD             | 47.612       | >50          | >40             | ND                 |
| 1394CG1(Rev-)      | C (T/F) | 0.008  | 0.011  | 0.042           | -0.720             | 3301.v1.c24                | AC             | 0.020        | 0.067        | 0.030           | -0.176             |
| Ce704809221_1B3    | C (T/F) | 0.021  | 0.026  | 0.027           | -0.109             | 6041.v3.c23                | AC             | 0.048        | >50          | 0.100           | -0.319             |
| CNE19              | BC      | 0.024  | >50    | 0.052           | -0.336             | 6540.v4.c1                 | AC             | 0.035        | 11.798       | 0.029           | 0.082              |
| CNE20              | BC      | 3.633  | 0.001  | 0.256           | -2.408             | 6545.v4.c1                 | AC             | 0.044        | >50          | 0.135           | -0.487             |
| CNE21              | BC      | 0.007  | 0.010  | 0.052           | -0.871             | 0815.v3.c3                 | ACD            | >50          | 0.030        | 24.937          | -2.920             |
| CNE17              | BC      | 0.029  | 0.432  | 0.061           | -0.323             | 3103.v3.c10                | ACD            | 25.391       | 0.014        | 5.523           | -2.596             |
| CNE30              | BC      | >50    | 2.055  | >40             | -1.289             |                            |                |              |              |                 |                    |
| CNE52              | BC      | 0.009  | >50    | 0.038           | -0.626             |                            |                |              |              |                 |                    |
| CNE53              | BC      | >50    | 0.010  | 6.578           | -2.818             |                            |                |              |              |                 |                    |
| CNE58              | BC      | 0.044  | 13.768 | 0.044           | 0.000              |                            |                |              |              |                 |                    |
| MS208.A1           | A       | 0.002  | >50    | 0.050           | -1.398             |                            |                |              |              |                 |                    |
|                    |         |        |        |                 |                    | <b>Total Viruses</b>       |                |              |              |                 |                    |
|                    |         |        |        |                 |                    |                            | <b>117</b>     | <b>117</b>   | <b>117</b>   |                 |                    |
|                    |         |        |        |                 |                    | <b>%Breadth</b>            |                |              |              |                 |                    |
|                    |         |        |        |                 |                    |                            | <b>83.8</b>    | <b>60.7</b>  | <b>88.0</b>  |                 |                    |
|                    |         |        |        |                 |                    | <b>Geometric mean IC50</b> |                |              |              |                 |                    |
|                    |         |        |        |                 |                    |                            | <b>0.071</b>   | <b>0.043</b> | <b>0.167</b> |                 |                    |

*In vitro* neutralization activity was determined by standardized TZM-bl assay. IC<sub>50</sub> values are expressed as µg/ml. Fold change values were calculated by dividing the IC<sub>50</sub> titer of the most potent (lowest IC<sub>50</sub>) of the two parental mAbs (PG16 or PGT128) by the IC<sub>50</sub> titer of the biNAb (PG16/PGT128). ND: not determined

**Table S4:** Comparison of the *in vitro* neutralization activity of human IgG1 PG16 and 10-1074 mAbs and PG16/10-1074 biNAb.

Related to Figure 2.

| Virus ID                   | Clade    | PG16         | 10-1074      | PG16/<br>10-1074 | log Fold<br>Change |
|----------------------------|----------|--------------|--------------|------------------|--------------------|
| SC422661.8                 | B        | 0.858        | 0.072        | 0.224            | -0.493             |
| TRO.11                     | B        | 1.922        | 0.014        | 0.028            | -0.301             |
| THRO4156.18                | B        | 6.825        | >50          | 21.692           | -0.502             |
| TRJO4551.58                | B        | 1.008        | 0.459        | 0.120            | 0.583              |
| YU2.DG                     | B        | 0.055        | 0.110        | 0.113            | -0.310             |
| Du422.1                    | C        | 0.261        | 0.082        | 0.018            | 0.659              |
| ZM249M.PL1                 | C        | 0.127        | >50          | 0.240            | -0.276             |
| ZM109F.PB4                 | C        | 7.033        | >50          | >40              | -0.755             |
| ZM135M.PL10a               | C        | >50          | 0.146        | 0.428            | -0.467             |
| CAP210.2.00.E8             | C        | 0.010        | >50          | 0.575            | -1.760             |
| HIV-16845-2.22             | C        | 3.126        | 1.930        | 0.402            | 0.681              |
| 249M B10                   | C (T/F)  | 0.026        | >50          | 0.146            | -0.749             |
| CNE30                      | BC       | >50          | 0.363        | 1.264            | -0.542             |
| MS208.A1                   | A        | 0.002        | 45.556       | 0.156            | -1.892             |
| Q23.17                     | A        | 0.008        | 0.006        | 0.001            | 0.778              |
| Q461.e2                    | A        | 1.755        | >50          | 26.032           | -1.171             |
| 0260.v5.c36                | A        | 1.538        | 0.201        | 0.091            | 0.344              |
| T257-31                    | CRF02_AG | 0.007        | >50          | 0.053            | -0.879             |
| 263-8                      | CRF02_AG | 0.347        | 0.763        | 0.222            | 0.194              |
| T250-4                     | CRF02_AG | 0.002        | 0.002        | 0.001            | 0.301              |
| T251-18                    | CRF02_AG | 1.721        | 1.011        | 2.028            | -0.302             |
| 211-9                      | CRF02_AG | 0.029        | 0.203        | 0.027            | 0.031              |
| 620345.c01                 | CRF01_AE | >50          | >50          | >50              | ND                 |
| R1166.c01                  | CRF01_AE | 0.280        | >50          | 41.588           | -2.172             |
| R3265.c06                  | CRF01_AE | 0.016        | >50          | 0.424            | -1.423             |
| C2101.c01                  | CRF01_AE | 0.012        | >50          | 0.164            | -1.136             |
| X1193_c1                   | G        | 0.018        | 0.091        | 0.039            | -0.336             |
| X2131_C1_B5                | G        | 0.024        | 0.023        | 0.012            | 0.283              |
| 3016.v5.c45                | D        | >50          | >50          | >50              | ND                 |
| 6952.v1.c20                | CD       | 21.865       | 0.030        | 0.067            | -0.349             |
| 6041.v3.c23                | AC       | 0.048        | 21.720       | 2.038            | -1.628             |
| 6540.v4.c1                 | AC       | 0.035        | >50          | 0.258            | -0.868             |
| <b>Total Viruses</b>       |          | <b>32</b>    | <b>32</b>    | <b>32</b>        |                    |
| <b>%Breadth</b>            |          | <b>87.5</b>  | <b>56.3</b>  | <b>87.5</b>      |                    |
| <b>Geometric mean IC50</b> |          | <b>0.139</b> | <b>0.183</b> | <b>0.192</b>     |                    |

*In vitro* neutralization activity was determined by standardized TZM-bl assay.  
IC<sub>50</sub> values are expressed as µg/ml.  
Fold change values were calculated by dividing the IC<sub>50</sub> titer of the most potent (lowest IC<sub>50</sub>) of the two parental mAbs (PG16 or 10-1074) by the IC<sub>50</sub> titer of the biNAb (PG16/10-1074).  
ND: not determined

**Table S5:** Comparison of the *in vitro* neutralization activity of human IgG1 PGT151 and 35022 mAbs and PGT151/35022 biNAb. **Related to Figure 2.**

| Virus ID           | Clade   | PGT151 | 35022  | PGT151/35022 | log Fold Change | Virus ID                   | Clade          | PGT151       | 35022  | PGT151/35022 | log Fold Change |
|--------------------|---------|--------|--------|--------------|-----------------|----------------------------|----------------|--------------|--------|--------------|-----------------|
| 6535.3             | B       | 0.005  | >50    | 0.020        | -0.602          | Q769.d22                   | A              | >50          | >50    | >50          | ND              |
| QH0692.42          | B       | 0.078  | 9.621  | 0.150        | -0.284          | Q259.d2.17                 | A              | 50.000       | >50    | 5.890        | 0.929           |
| SC422661.8         | B       | 0.012  | >50    | 0.032        | -0.426          | Q842.d12                   | A              | 0.024        | 11.580 | 0.045        | -0.273          |
| PVO.4              | B       | 0.129  | >50    | 0.424        | -0.517          | Q260.v5.c36                | A              | 0.355        | >50    | 0.680        | -0.282          |
| TRO.11             | B       | >50    | >50    | >50          | ND              | 3415.v1.c1                 | A              | 0.009        | >50    | 0.024        | -0.426          |
| AC10.0.29          | B       | 0.007  | 8.782  | 0.028        | -0.602          | 3365.v2.c2                 | A              | 0.011        | >50    | 0.065        | -0.772          |
| RHPA4259.7         | B       | 0.035  | >50    | 0.068        | -0.288          | 191955_A11                 | A (T/F)        | 0.016        | 20.351 | 0.043        | -0.429          |
| THRO4156.18        | B       | >50    | >50    | >50          | ND              | 191084_B7-19               | A (T/F)        | 0.014        | >50    | 0.044        | -0.497          |
| REJO4541.67        | B       | 0.096  | 0.355  | 0.075        | 0.107           | 9004SS_A3_4                | A (T/F)        | 0.027        | >50    | 0.051        | -0.276          |
| TRJO4551.58        | B       | 1.053  | 5.474  | 0.752        | 0.146           | T257-31                    | CRF02_AG       | 0.006        | >50    | 0.024        | -0.602          |
| WITO4160.33        | B       | 0.005  | >50    | 0.024        | -0.681          | 928-28                     | CRF02_AG       | >50          | >50    | >50          | ND              |
| CAAN5342.A2        | B       | 0.013  | 1.591  | 0.058        | -0.649          | 263-8                      | CRF02_AG       | >50          | >50    | >50          | ND              |
| YU2.DG             | B       | 11.373 | >50    | 41.362       | -0.561          | T250-4                     | CRF02_AG       | 0.011        | >50    | 0.024        | -0.339          |
| WEAU d15 410 787   | B (T/F) | 0.098  | >50    | 0.112        | -0.058          | 1751-18                    | CRF02_AG       | 0.782        | >50    | 1.504        | -0.284          |
| 1006 11 C3 1601    | B (T/F) | 3.367  | >50    | 6.427        | -0.281          | T278-50                    | CRF02_AG       | 0.260        | >50    | 0.460        | -0.248          |
| 1054_07_TC4_1499   | B (T/F) | 0.015  | >50    | 0.023        | -0.186          | 215-34                     | CRF02_AG       | 0.014        | >50    | 0.026        | -0.269          |
| 1056_10_TA11_1826  | B (T/F) | 0.023  | >50    | 0.188        | -0.912          | T25-9                      | CRF02_AG       | 0.006        | 12.641 | 0.022        | -0.564          |
| 1012_11_TC21_3257  | B (T/F) | >50    | >50    | >50          | ND              | 235-47                     | CRF02_AG       | >50          | >50    | >50          | ND              |
| 6240_08_TA5_4622   | B (T/F) | 0.112  | 4.100  | 0.406        | -0.559          | 620345.c01                 | CRF01_AE       | >50          | >50    | >50          | ND              |
| 6244_13_B5_4576    | B (T/F) | >50    | >50    | >50          | ND              | CNE8                       | CRF01_AE       | >50          | >50    | >50          | ND              |
| 62357_14_D3_4589   | B (T/F) | 0.024  | 0.243  | 0.034        | -0.151          | C1080.c03                  | CRF01_AE       | >50          | 0.288  | 0.440        | -0.184          |
| SC05_8C11_2344     | B (T/F) | 0.153  | >50    | 1.320        | -0.936          | R2184.c04                  | CRF01_AE       | >50          | 16.954 | 45.045       | -0.424          |
| Du156.12           | C       | 0.011  | >50    | 0.046        | -0.621          | R1166.c01                  | CRF01_AE       | >50          | >50    | >50          | ND              |
| Du172.17           | C       | 0.008  | >50    | 0.029        | -0.559          | R3265.c06                  | CRF01_AE       | >50          | >50    | >50          | ND              |
| Du422.1            | C       | 1.149  | 13.085 | 0.454        | 0.403           | C2101.c01                  | CRF01_AE       | 50.000       | >50    | 29.517       | 0.229           |
| ZM197M.PB7         | C       | 0.011  | >50    | 0.095        | -0.936          | C3347.c11                  | CRF01_AE       | >50          | >50    | >50          | ND              |
| ZM214M.PL15        | C       | 0.034  | >50    | 0.038        | -0.048          | C4118.c09                  | CRF01_AE       | >50          | 0.097  | 0.173        | -0.251          |
| ZM233M.PB6         | C       | 0.038  | 1.406  | 0.060        | -0.198          | CNE5                       | CRF01_AE       | >50          | >50    | >50          | ND              |
| ZM249M.PL1         | C       | 0.010  | 0.221  | 0.033        | -0.519          | BJOX009000.02.4            | CRF01_AE       | >50          | >50    | >50          | ND              |
| ZM53M.PB12         | C       | >50    | >50    | >50          | ND              | BJOX015000.11.5            | CRF01_AE (T/F) | >50          | >50    | >50          | ND              |
| ZM109F.PB4         | C       | 0.501  | >50    | 2.487        | -0.696          | BJOX010000.06.2            | CRF01_AE (T/F) | >50          | >50    | >50          | ND              |
| ZM135M.PL10a       | C       | >50    | >50    | >50          | ND              | BJOX025000.01.1            | CRF01_AE (T/F) | >50          | >50    | >50          | ND              |
| CAP45.2.00.G3      | C       | 0.103  | 2.224  | 0.120        | -0.066          | BJOX028000.10.3            | CRF01_AE (T/F) | 50.000       | >50    | 24.369       | 0.312           |
| CAP210.2.00.E8     | C       | 0.020  | 0.422  | 0.095        | -0.677          | X1193_c1                   | G              | 0.027        | 5.092  | 0.058        | -0.332          |
| HIV-001428-2.42    | C       | 0.078  | >50    | 0.329        | -0.625          | P0402_c2_11                | G              | 0.012        | 41.444 | 0.030        | -0.398          |
| HIV-0013095-2.11   | C       | 2.075  | >50    | 11.832       | -0.756          | X1254_c3                   | G              | 0.263        | >50    | 1.977        | -0.876          |
| HIV-16055-2.3      | C       | 0.174  | >50    | 1.828        | -1.021          | X2088_c9                   | G              | >50          | >50    | >50          | ND              |
| HIV-16845-2.22     | C       | >50    | >50    | >50          | ND              | X2131_C1_B5                | G              | 0.019        | >50    | 0.076        | -0.602          |
| Ce1086_B2          | C (T/F) | 0.250  | >50    | 0.419        | -0.224          | P1981_C5_3                 | G              | 0.133        | 0.622  | 0.176        | -0.122          |
| Ce0393_C3          | C (T/F) | >50    | >50    | >50          | ND              | X1632_S2_B10               | G              | 1.207        | >50    | 0.714        | 0.228           |
| Ce1176_A3          | C (T/F) | 0.007  | 1.551  | 0.017        | -0.385          | 3016.v5.c45                | D              | 0.641        | >50    | 1.785        | -0.445          |
| Ce2010_F5          | C (T/F) | >50    | 2.719  | 48.524       | -1.252          | A07412M1.vrc12             | D              | 0.808        | >50    | 6.110        | -0.879          |
| Ce0682_E4          | C (T/F) | >50    | >50    | >50          | ND              | 231965.c01                 | D              | 0.019        | >50    | 0.048        | -0.402          |
| Ce1172_H1          | C (T/F) | >50    | >50    | >50          | ND              | 231966.c02                 | D              | 0.159        | >50    | 0.913        | -0.759          |
| Ce2060_G9          | C (T/F) | 0.902  | >50    | 2.570        | -0.455          | 191821_E6_1                | D (T/F)        | 0.276        | >50    | 1.153        | -0.621          |
| Ce703010054_2A2    | C (T/F) | 0.047  | 17.054 | 0.137        | -0.465          | 3817.v2.c59                | CD             | >50          | >50    | >50          | ND              |
| BF1266.431a        | C (T/F) | >50    | >50    | >50          | ND              | 6480.v4.c25                | CD             | >50          | >50    | >50          | ND              |
| 246F_C1G           | C (T/F) | >50    | 25.031 | 2.924        | 0.933           | 6952.v1.c20                | CD             | >50          | >50    | >50          | ND              |
| 249M_B10           | C (T/F) | 0.021  | 1.034  | 0.050        | -0.377          | 6811.v7.c18                | CD             | >50          | >50    | >50          | ND              |
| ZM247v1(Rev-)      | C (T/F) | 0.068  | >50    | 0.248        | -0.562          | 89-F1_2_25                 | CD             | >50          | >50    | >50          | ND              |
| 7030102001E5(Rev-) | C (T/F) | 0.009  | >50    | 0.032        | -0.551          | 3301.v1.c24                | AC             | 0.036        | 24.840 | 0.077        | -0.330          |
| 1394C9G1(Rev-)     | C (T/F) | 0.051  | >50    | 0.088        | -0.237          | 6041.v3.c23                | AC             | 0.034        | >50    | 0.076        | -0.349          |
| Ce704809221_1B3    | C (T/F) | >50    | 0.565  | 2.460        | -0.639          | 6540.v4.c1                 | AC             | 0.024        | >50    | 0.065        | -0.433          |
| CNE19              | BC      | 0.049  | 0.651  | 0.063        | -0.109          | 6545.v4.c1                 | AC             | 0.023        | >50    | 0.062        | -0.431          |
| CNE20              | BC      | >50    | >50    | >50          | ND              | 0815.v3.c3                 | ACD            | >50          | 10.664 | 0.102        | 2.019           |
| CNE21              | BC      | 0.004  | >50    | 0.019        | -0.677          | 3103.v3.c10                | ACD            | 0.115        | >50    | 0.311        | -0.432          |
| CNE17              | BC      | 0.231  | >50    | 1.922        | -0.920          | <b>Total Viruses</b>       |                |              |        |              |                 |
| CNE30              | BC      | 39.348 | >50    | 6.218        | 0.801           | <b>120</b>                 | <b>120</b>     | <b>120</b>   |        |              |                 |
| CNE52              | BC      | 0.022  | >50    | 0.049        | -0.348          | <b>%Breadth</b>            |                |              |        |              |                 |
| CNE53              | BC      | >50    | >50    | >50          | ND              | <b>64.2</b>                | <b>27.5</b>    | <b>72.5</b>  |        |              |                 |
| CNE58              | BC      | 0.007  | 42.173 | 0.031        | -0.646          | <b>Geometric mean IC50</b> |                |              |        |              |                 |
| MS208.A1           | A       | 0.006  | >50    | 0.032        | -0.727          | <b>0.077</b>               | <b>2.840</b>   | <b>0.220</b> |        |              |                 |
| Q23.17             | A       | 0.018  | 2.797  | 0.040        | -0.347          |                            |                |              |        |              |                 |
| Q461.e2            | A       | 2.569  | 0.231  | 0.306        | -0.122          |                            |                |              |        |              |                 |

*In vitro* neutralization activity was determined by standardized TZM-bl assay. IC<sub>50</sub> values are expressed as µg/ml. Fold change values were calculated by dividing the IC<sub>50</sub> titer of the most potent (lowest IC<sub>50</sub>) of the two parental mAbs (PGT151 or 35022) by the IC<sub>50</sub> titer of the biNAb (PGT151/35022). ND: not determined



**Related to Figure 4.**

**Table S6: *In vitro* neutralization activity (IC<sub>50</sub> and IC<sub>80</sub> titers) of hinge variants of 3BNC117/10-1074 biNAb.**

| Virus ID           | Clade   | IgG1  |        | IgG3C- |        | Fold Change log |        | Virus ID        | Clade          | IgG1   |        | IgG3C- |       | Fold Change log |        |
|--------------------|---------|-------|--------|--------|--------|-----------------|--------|-----------------|----------------|--------|--------|--------|-------|-----------------|--------|
|                    |         | IC50  | IC80   | IC50   | IC80   | IC50            | IC80   |                 |                | IC50   | IC80   | IC50   | IC80  | IC50            | IC80   |
| 6535.3             | B       | 0.083 | 0.363  | 0.015  | 0.070  | 0.743           | 0.715  | Q769.d22        | A              | 0.028  | 0.170  | 0.014  | 0.083 | 0.301           | 0.311  |
| QH0692.42          | B       | 0.282 | 0.994  | 0.175  | 0.830  | 0.207           | 0.078  | Q259.d2.17      | A              | 0.359  | 1.264  | 0.081  | 0.389 | 0.647           | 0.512  |
| SC422661.8         | B       | 0.108 | 0.458  | 0.045  | 0.161  | 0.380           | 0.454  | Q842.d12        | A              | 0.019  | 0.053  | 0.014  | 0.049 | 0.133           | 0.034  |
| PVO.4              | B       | 0.067 | 0.218  | 0.023  | 0.096  | 0.464           | 0.356  | Q260.v5.c36     | A              | 0.312  | 0.823  | 0.210  | 0.708 | 0.172           | 0.065  |
| TRO.11             | B       | 0.060 | 0.162  | 0.025  | 0.088  | 0.380           | 0.265  | 3415.v1.c1      | A              | 0.224  | 0.609  | 0.135  | 0.488 | 0.220           | 0.096  |
| AC10.0.29          | B       | 0.248 | 1.121  | 0.051  | 0.318  | 0.687           | 0.547  | 3365.v2.c2      | A              | 0.066  | 0.182  | 0.041  | 0.148 | 0.207           | 0.090  |
| RHPA4259.7         | B       | 0.030 | 0.108  | 0.014  | 0.067  | 0.331           | 0.207  | 191955.A11      | A (T/F)        | >20    | >20    | >20    | >20   | ND              | ND     |
| THRO4156.18        | B       | 7.226 | >20    | 5.716  | 17.271 | 1.02            | 0.064  | 191084.B7-19    | A (T/F)        | 0.121  | 0.334  | 0.060  | 0.209 | 0.305           | 0.204  |
| REJQ4541.67        | B       | 0.129 | 0.450  | 0.043  | 0.209  | 0.477           | 0.333  | 9004SS.A3.4     | A (T/F)        | 0.068  | 0.191  | 0.030  | 0.088 | 0.355           | 0.337  |
| TRJQ4551.58        | B       | 0.270 | 0.905  | 0.168  | 0.571  | 0.206           | 0.200  | T257-31         | CRF02.AG       | 0.369  | 1.753  | 0.285  | 1.424 | 0.112           | 0.090  |
| WITQ4160.33        | B       | 0.066 | 0.233  | 0.023  | 0.120  | 0.458           | 0.288  | 928-28          | CRF02.AG       | 0.424  | 1.615  | 0.338  | 1.709 | 0.098           | -0.025 |
| CAANS342.A2        | B       | 0.115 | 0.395  | 0.020  | 0.101  | 0.760           | 0.592  | 263-9           | CRF02.AG       | 0.053  | 0.194  | 0.029  | 0.149 | 0.262           | 0.115  |
| YU2.DG             | B       | 0.037 | 0.101  | 0.024  | 0.070  | 0.188           | 0.159  | T250-4          | CRF02.AG       | 0.040  | 0.115  | 0.007  | 0.027 | 0.757           | 0.629  |
| WEAU.d15.410.787   | B (T/F) | 0.107 | 0.370  | 0.035  | 0.228  | 0.485           | 0.210  | T251-18         | CRF02.AG       | 0.455  | 1.254  | 0.350  | 1.203 | 0.114           | 0.018  |
| 1006.11.C3.1601    | B (T/F) | 0.018 | 0.061  | 0.006  | 0.017  | 0.477           | 0.555  | T278-50         | CRF02.AG       | >20    | >20    | 14.538 | >20   | 0.139           | ND     |
| 1054.07.TC4.1499   | B (T/F) | 0.177 | 0.795  | 0.053  | 0.366  | 0.524           | 0.337  | T255-34         | CRF02.AG       | 0.186  | 0.819  | 0.081  | 0.351 | 0.361           | 0.368  |
| 1055.10.TA11.1826  | B (T/F) | 0.240 | 0.808  | 0.062  | 0.342  | 0.588           | 0.373  | 211-9           | CRF02.AG       | 0.680  | 2.430  | 0.232  | 1.104 | 0.467           | 0.343  |
| 1012.11.TC21.3257  | B (T/F) | 0.029 | 0.129  | 0.017  | 0.080  | 0.232           | 0.207  | 235-47          | CRF02.AG       | 0.114  | 0.407  | 0.044  | 0.221 | 0.413           | 0.265  |
| 6240.08.TA5.4622   | B (T/F) | 0.225 | 0.638  | 0.095  | 0.349  | 0.374           | 0.282  | 620345.c01      | CRF01.AE       | >20    | >20    | >20    | >20   | ND              | ND     |
| 6244.13.B5.4576    | B (T/F) | 0.107 | 0.368  | 0.064  | 0.286  | 0.223           | 0.109  | CNE8            | CRF01.AE       | 0.406  | 1.468  | 0.237  | 1.212 | 0.234           | 0.083  |
| 62357.14.D3.4589   | B (T/F) | 0.120 | 0.394  | 0.056  | 0.255  | 0.331           | 0.189  | C1080.c03       | CRF01.AE       | 0.400  | 1.947  | 0.241  | 1.552 | 0.220           | 0.098  |
| SC05.BC11.2344     | B (T/F) | 0.178 | 0.481  | 0.076  | 0.264  | 0.370           | 0.261  | R2184.c04       | CRF01.AE       | 0.062  | 0.214  | 0.033  | 0.147 | 0.274           | 0.163  |
| Du156.12           | C       | 0.059 | 0.261  | 0.012  | 0.058  | 0.692           | 0.653  | R1166.c01       | CRF01.AE       | 0.354  | 1.232  | 0.305  | 1.458 | 0.065           | -0.073 |
| Du172.17           | C       | 0.344 | 1.223  | 0.114  | 0.519  | 0.480           | 0.372  | R3265.c06       | CRF01.AE       | 3.613  | >20    | 0.093  | 4.022 | 1.589           | 0.697  |
| Du422.1            | C       | 0.964 | 3.662  | 0.162  | 0.609  | 0.775           | 0.779  | C2101.c01       | CRF01.AE       | 0.131  | 0.446  | 0.058  | 0.387 | 0.354           | 0.062  |
| ZM197M.PB7         | C       | 1.185 | 5.454  | 0.741  | 2.529  | 0.204           | 0.334  | C3347.c11       | CRF01.AE       | 0.077  | 0.337  | 0.038  | 0.236 | 0.307           | 0.155  |
| ZM214M.PL15        | C       | 0.299 | 1.972  | 0.045  | 0.797  | 0.822           | 0.393  | C4118.c09       | CRF01.AE       | 0.462  | 1.013  | 0.205  | 0.811 | 0.353           | 0.097  |
| ZM233M.PB6         | C       | 0.314 | 1.097  | 0.047  | 0.221  | 0.825           | 0.696  | CNE5            | CRF01.AE       | 1.950  | 5.409  | 0.786  | 2.968 | 0.395           | 0.261  |
| ZM249M.PL.1        | C       | 0.224 | 1.055  | 0.113  | 0.573  | 0.297           | 0.265  | BJOX009000.02.4 | CRF01.AE       | 2.557  | 7.419  | 1.194  | 4.925 | 0.331           | 0.178  |
| ZM53M.PB12         | C       | 0.811 | 2.810  | 0.293  | 0.997  | 0.442           | 0.450  | BJOX015000.11.5 | CRF01.AE (T/F) | 0.589  | 2.734  | 0.152  | 1.115 | 0.588           | 0.390  |
| ZM109F.PB4         | C       | 2.252 | 10.124 | 0.569  | 4.565  | 0.597           | 0.346  | BJOX010000.06.2 | CRF01.AE (T/F) | 12.713 | >20    | 4.874  | >20   | 0.416           | ND     |
| ZM135M.PL10a       | C       | 0.183 | 0.638  | 0.092  | 0.419  | 0.299           | 0.183  | BJOX025000.01.1 | CRF01.AE (T/F) | 0.286  | 1.727  | 0.145  | 1.184 | 0.295           | 0.164  |
| CAP45.2.00.G3      | C       | >20   | >20    | 6.276  | >20    | 0.503           | ND     | BJOX028000.10.3 | CRF01.AE (T/F) | 0.044  | 0.379  | 0.009  | 0.123 | 0.689           | 0.489  |
| CAP210.2.00.E8     | C       | >20   | >20    | 12.977 | >20    | 0.188           | ND     | X1193.c1        | G              | 0.181  | 0.606  | 0.089  | 0.389 | 0.308           | 0.193  |
| HIV-001428-2.42    | C       | 0.029 | 0.081  | 0.020  | 0.054  | 0.161           | 0.176  | P0402.c2.11     | G              | 0.036  | 0.134  | 0.013  | 0.058 | 0.442           | 0.364  |
| HIV-0013095-2.11   | C       | 4.045 | 16.833 | 0.705  | 5.412  | 0.759           | 0.493  | X1254.c3        | G              | 0.320  | 1.065  | 0.133  | 0.445 | 0.381           | 0.371  |
| HIV-16055-2.3      | C       | >20   | >20    | 11.930 | >20    | 0.224           | ND     | X2088.c9        | G              | 0.126  | 0.419  | 0.020  | 0.059 | 0.799           | 0.851  |
| HIV-16845-2.22     | C       | 4.447 | >20    | 1.804  | 9.944  | 0.392           | 0.324  | X2131.C1.B5     | G              | 0.171  | 0.722  | 0.055  | 0.184 | 0.493           | 0.594  |
| Ce1086.B2          | C (T/F) | 1.722 | 5.331  | 0.632  | 3.563  | 0.435           | 0.175  | P1981.C5.3      | G              | 0.077  | 0.172  | 0.029  | 0.088 | 0.424           | 0.291  |
| Ce0393.C3          | C (T/F) | 0.916 | 2.024  | 0.836  | 1.958  | 0.040           | 0.014  | X1632.S2.B10    | G              | >20    | >20    | 2.206  | >20   | 0.957           | ND     |
| Ce1176.A3          | C (T/F) | 0.211 | 0.471  | 0.071  | 0.201  | 0.473           | 0.370  | 3016.v5.c45     | D              | 17.306 | >20    | 2.627  | >20   | 0.819           | ND     |
| Ce2010.F5          | C (T/F) | 0.288 | 0.943  | 0.235  | 0.816  | 0.088           | 0.063  | A07412M1.vrc12  | D              | 0.104  | 0.333  | 0.041  | 0.117 | 0.404           | 0.454  |
| Ce0682.E4          | C (T/F) | 0.077 | 0.255  | 0.043  | 0.194  | 0.253           | 0.119  | Z31965.c01      | D              | 0.275  | 0.755  | 0.127  | 0.453 | 0.336           | 0.222  |
| Ce1172.H1          | C (T/F) | 0.454 | 2.072  | 0.055  | 0.396  | 0.917           | 0.719  | Z31966.c02      | D              | 4.740  | 18.123 | 1.263  | 6.726 | 0.574           | 0.430  |
| Ce2060.G9          | C (T/F) | 0.359 | 1.511  | 0.274  | 1.094  | 0.117           | 0.140  | 191821.E6.1     | D (T/F)        | 0.902  | 3.110  | 0.448  | 3.137 | 0.304           | -0.004 |
| Ce703010054.2A2    | C (T/F) | 1.710 | 5.437  | 0.625  | 5.114  | 0.437           | 0.027  | 3817.v2.c59     | CD             | 0.916  | 4.500  | 0.471  | 2.275 | 0.289           | 0.296  |
| BF1266.431a        | C (T/F) | 0.358 | 1.233  | 0.098  | 0.705  | 0.563           | 0.243  | 6480.v4.c25     | CD             | 0.034  | 0.111  | 0.014  | 0.049 | 0.385           | 0.355  |
| 246F.C1G           | C (T/F) | 0.640 | 2.274  | 0.140  | 0.661  | 0.860           | 0.537  | 6952.v1.c20     | CD             | 0.251  | 0.684  | 0.073  | 0.261 | 0.536           | 0.418  |
| 249M.B10           | C (T/F) | 0.355 | 1.155  | 0.184  | 0.863  | 0.285           | 0.127  | 6811.v7.c18     | CD             | 0.029  | 0.104  | 0.009  | 0.026 | 0.508           | 0.602  |
| ZM247v1(Rev-)      | C (T/F) | 1.538 | 4.174  | 0.236  | 1.041  | 0.814           | 0.603  | 89-F1.2.25      | CD             | >20    | >20    | >20    | >20   | ND              | ND     |
| 7030102001E5(Rev-) | C (T/F) | 0.127 | 0.331  | 0.033  | 0.123  | 0.585           | 0.430  | 3301.v1.c24     | AC             | 0.066  | 0.217  | 0.030  | 0.098 | 0.342           | 0.345  |
| 1394C9G1(Rev-)     | C (T/F) | 0.592 | 1.986  | 0.123  | 0.479  | 0.682           | 0.618  | 6041.v3.c23     | AC             | 0.197  | 1.241  | 0.046  | 0.223 | 0.632           | 0.745  |
| Ce704809221.1B3    | C (T/F) | 0.357 | 1.347  | 0.068  | 0.648  | 0.720           | 0.318  | 6540.v4.c1      | AC             | >20    | >20    | >20    | >20   | ND              | ND     |
| CNE19              | BC      | 0.124 | 0.765  | 0.041  | 0.261  | 0.481           | 0.467  | 6545.v4.c1      | AC             | >20    | >20    | >20    | >20   | ND              | ND     |
| CNE20              | BC      | 0.054 | 0.176  | 0.014  | 0.039  | 0.586           | 0.654  | 0815.v3.c3      | ACD            | 0.029  | 0.083  | 0.012  | 0.046 | 0.383           | 0.256  |
| CNE21              | BC      | 0.548 | 1.407  | 0.183  | 0.480  | 0.476           | 0.467  | 3103.v3.c10     | ACD            | 0.265  | 0.716  | 0.085  | 0.296 | 0.494           | 0.384  |
| CNE17              | BC      | 3.337 | 10.638 | 1.216  | 5.016  | 0.438           | 0.327  | IgG1            |                |        |        |        |       |                 |        |
| CNE30              | BC      | 0.772 | 2.682  | 0.390  | 1.533  | 0.297           | 0.243  | Total Viruses   |                |        |        | 120    | 120   | 120             | 120    |
| CNE52              | BC      | 0.174 | 0.590  | 0.086  | 0.418  | 0.306           | 0.150  | IC50            |                |        |        | IC80   | IC50  | IC80            |        |
| CNE53              | BC      | 0.128 | 0.329  | 0.050  | 0.231  | 0.408           | 0.154  | %Breadth        |                |        |        | 91.7   | 87.5  | 95.8            | 90.0   |
| CNE58              | BC      | 0.364 | 1.081  | 0.121  | 0.698  | 0.478           | 0.190  | Geometric mean  |                |        |        | 0.242  | 0.717 | 0.110           | 0.388  |
| MS208.A1           | A       | 0.200 | 0.724  | 0.113  | 0.514  | 0.248           | 0.149  |                 |                |        |        |        |       |                 |        |
| Q23.17             | A       | 0.020 | 0.069  | 0.011  | 0.031  | 0.260           | 0.347  |                 |                |        |        |        |       |                 |        |
| Q461.e2            | A       | 0.167 | 0.464  | 0.142  | 0.684  | 0.070           | -0.169 |                 |                |        |        |        |       |                 |        |

*In vitro* neutralization activity was determined by standardized TZM-bl assay.

IC<sub>50</sub> and IC<sub>80</sub> values are expressed as μg/ml.

Fold change values were calculated by dividing the IC<sub>50</sub> or IC<sub>80</sub> titer of the

IgG3C- with that of IgG1 hinge variant biNAb.

ND: not determined

**Table S8:** Comparison of the *in vitro* neutralization activity of IgG3C- hinge variants of 8ANC195 and PGT128 mAbs and 8ANC195/PGT128 biNab. **Related to Figure 5.**

| Virus ID            | Clade   | 8ANC195 |        | PGT128 |        | 8ANC195/ PGT128 |        | log Fold Change |        | Virus ID                                                  | Clade          | 8ANC195 |        | PGT128 |        | 8ANC195/ PGT128 |        | log Fold Change |        |
|---------------------|---------|---------|--------|--------|--------|-----------------|--------|-----------------|--------|-----------------------------------------------------------|----------------|---------|--------|--------|--------|-----------------|--------|-----------------|--------|
|                     |         | IC50    | IC80   | IC50   | IC80   | IC50            | IC80   | IC50            | IC80   |                                                           |                | IC50    | IC80   | IC50   | IC80   | IC50            | IC80   | IC50            | IC80   |
| 6535_3              | B       | 0.093   | 0.664  | 0.007  | 0.032  | 0.008           | 0.036  | -0.058          | -0.051 | Q259_d2.17                                                | A              | >30     | >30    | >30    | >30    | >30             | >30    | ND              | ND     |
| QH0692_42           | B       | 1.229   | 5.089  | 0.016  | 0.051  | 0.018           | 0.062  | -0.051          | -0.085 | Q842_d12                                                  | A              | >30     | >30    | 0.049  | 0.179  | 0.080           | 0.297  | -0.213          | -0.220 |
| SC422661.8          | B       | 0.173   | 1.199  | 1.772  | 13.645 | 0.025           | 0.115  | 0.840           | 1.018  | 3415.v1.c1                                                | A              | 0.687   | 2.513  | 0.012  | 0.036  | 0.025           | 0.076  | -0.319          | -0.325 |
| PVO_4               | B       | 0.095   | 0.606  | 0.010  | 0.037  | 0.011           | 0.054  | -0.041          | -0.164 | 3365.v2.c2                                                | A              | >30     | >30    | >30    | >30    | 25.057          | >30    | 0.078           | ND     |
| TRO.11              | B       | 0.103   | 0.434  | 0.026  | 0.089  | 0.014           | 0.047  | 0.269           | 0.277  | 191955_A11                                                | A (T/F)        | >30     | >30    | 10.896 | >30    | 3.948           | 22.226 | 0.441           | 0.130  |
| AC10.0.29           | B       | 0.544   | 2.180  | 0.006  | 0.025  | 0.009           | 0.044  | -0.176          | -0.246 | 191084_B7-19                                              | A (T/F)        | 0.994   | 6.140  | 0.041  | 0.195  | 0.048           | 0.223  | -0.068          | -0.058 |
| RHPA4259.7          | B       | 0.231   | 1.167  | 0.019  | 0.108  | 0.011           | 0.056  | 0.237           | 0.285  | 9004SS_A3_4                                               | A (T/F)        | 0.219   | 0.978  | 0.013  | 0.037  | 0.019           | 0.065  | -0.165          | -0.245 |
| THRO4156.18         | B       | >30     | >30    | >30    | >30    | >30             | >30    | ND              | ND     | T257-31                                                   | CRF02_AG       | 0.245   | 1.089  | 29.833 | >30    | 0.056           | 0.154  | 0.641           | 0.850  |
| REJO451.67          | B       | 0.127   | 0.581  | >30    | >30    | 0.076           | 0.366  | 0.223           | 0.201  | 928-28                                                    | CRF02_AG       | >30     | >30    | >30    | >30    | >30             | >30    | ND              | ND     |
| TRJO451.58          | B       | 0.319   | 1.091  | 0.034  | 0.098  | 0.049           | 0.113  | -0.159          | -0.062 | 263-8                                                     | CRF02_AG       | >30     | >30    | 0.231  | 2.171  | 0.187           | 1.664  | 0.092           | 0.116  |
| WITO4160.33         | B       | >30     | >30    | >30    | >30    | 0.316           | 12.866 | 1.977           | 0.368  | T250-4                                                    | CRF02_AG       | >30     | >30    | 0.003  | 0.012  | 0.012           | 0.037  | 0.602           | -0.489 |
| CAPAN5342.A2        | B       | >30     | >30    | 0.145  | >30    | 0.088           | 0.945  | 0.217           | 1.502  | T251-18                                                   | CRF02_AG       | 0.173   | 0.947  | 18.585 | >30    | 0.057           | 0.171  | 0.482           | 0.743  |
| WEAU_d15_410_787    | B (T/F) | >30     | >30    | 0.016  | 0.074  | 0.030           | 0.229  | -0.273          | -0.491 | T278-50                                                   | CRF02_AG       | 22.511  | >30    | 0.013  | 0.037  | 0.024           | 0.109  | -0.266          | -0.469 |
| 1006_11_C3_1601     | B (T/F) | 0.157   | 1.812  | 0.009  | 0.035  | 0.006           | 0.029  | 0.176           | 0.082  | T255-34                                                   | CRF02_AG       | 0.730   | 4.339  | >30    | >30    | 0.475           | 4.951  | 0.187           | -0.057 |
| 1054_07_TC4_1499    | B (T/F) | 0.205   | 5.572  | 0.043  | 0.267  | 0.013           | 0.081  | 0.520           | 0.518  | 211-9                                                     | CRF02_AG       | 1.329   | 5.628  | 0.069  | 0.236  | 0.106           | 0.320  | -0.186          | -0.132 |
| 1056_10_TA11_1826   | B (T/F) | >30     | >30    | 0.004  | 0.019  | 0.008           | 0.035  | -0.301          | -0.265 | 235-47                                                    | CRF02_AG       | >30     | >30    | >30    | >30    | >30             | >30    | ND              | ND     |
| 1012_11_TC21_3257   | B (T/F) | >30     | >30    | 0.011  | 0.040  | 0.017           | 0.118  | -0.189          | -0.470 | 620345.c01                                                | CRF01_AE       | >30     | >30    | >30    | >30    | >30             | >30    | ND              | ND     |
| 6240_08_TA5_4622    | B (T/F) | >30     | >30    | 0.020  | 0.060  | 0.024           | 0.099  | -0.079          | -0.217 | CNE8                                                      | CRF01_AE       | 0.415   | 2.121  | 0.011  | 0.037  | 0.023           | 0.069  | -0.320          | -0.271 |
| 6244_13_B5_4576     | B (T/F) | >30     | >30    | 0.033  | 0.119  | 0.045           | 0.163  | -0.135          | -0.137 | C1080.c03                                                 | CRF01_AE       | 0.228   | 0.968  | 0.128  | 0.939  | 0.029           | 0.096  | 0.645           | 0.990  |
| 62357_14_D3_4589    | B (T/F) | >30     | >30    | 0.731  | 7.088  | 0.053           | 0.441  | 1.140           | 1.206  | R2194.c04                                                 | CRF01_AE       | 0.017   | 0.088  | 1.775  | 26.750 | 0.015           | 0.054  | 0.054           | 0.212  |
| SC05_8C11_2344      | B (T/F) | 0.242   | 1.117  | 0.025  | 0.070  | 0.018           | 0.052  | 0.143           | 0.129  | R1166.c01                                                 | CRF01_AE       | 1.143   | 5.965  | >30    | >30    | 1.348           | 6.441  | 0.421           | -0.033 |
| Du172.17            | C       | 5.923   | 24.128 | 0.032  | 0.148  | 0.035           | 0.125  | -0.039          | 0.073  | C2101.c01                                                 | CRF01_AE       | 0.757   | 4.627  | 0.018  | 0.062  | 0.019           | 0.049  | -0.023          | 0.102  |
| Du422.1             | C       | >30     | >30    | 0.063  | 0.189  | 0.043           | 0.196  | 0.166           | -0.018 | C3347.c11                                                 | CRF01_AE       | >30     | >30    | 0.003  | 0.017  | 0.018           | 0.083  | 0.775           | -0.689 |
| ZM197M.PB7          | C       | 7.711   | >30    | >30    | >30    | 6.715           | >30    | 0.060           | ND     | C4118.c09                                                 | CRF01_AE       | 0.054   | 0.378  | >30    | >30    | 0.071           | 0.466  | -0.119          | -0.091 |
| ZM1214M.PL15        | C       | 0.487   | 6.454  | 1.057  | 9.008  | 0.040           | 0.256  | 1.085           | 1.402  | CNE5                                                      | CRF01_AE       | 0.741   | 3.642  | 0.045  | 0.377  | 0.027           | 0.098  | 0.222           | 0.585  |
| ZM233M.PB6          | C       | 4.871   | 19.132 | >30    | >30    | 2.403           | 9.770  | 0.307           | 0.292  | BJOX009000.02.4                                           | CRF01_AE       | 0.507   | 2.034  | 0.014  | 0.031  | 0.020           | 0.052  | -0.155          | -0.225 |
| ZM249M.PL1          | C       | >30     | >30    | 1.786  | 16.796 | 0.097           | 0.937  | 1.265           | 1.253  | BJOX015000.11.5                                           | CRF01_AE (T/F) | 0.123   | 1.759  | 0.009  | 0.039  | 0.016           | 0.077  | 0.250           | -0.295 |
| ZM53M.PB12          | C       | 12.846  | >30    | >30    | >30    | 18.396          | >30    | -0.156          | ND     | BJOX010000.06.2                                           | CRF01_AE (T/F) | 0.320   | 2.477  | 24.629 | >30    | 0.122           | 0.585  | 0.419           | 0.627  |
| ZM109F.PB4          | C       | >30     | >30    | >30    | >30    | >30             | >30    | ND              | ND     | BJOX025000.01.1                                           | CRF01_AE (T/F) | 2.811   | 19.046 | >30    | >30    | 2.086           | >30    | 0.130           | -0.197 |
| ZM135M.PL10a        | C       | >30     | >30    | 1.981  | 15.180 | 0.134           | 0.864  | 1.170           | 1.245  | BJOX028000.10.3                                           | CRF01_AE (T/F) | 0.316   | 2.134  | 0.018  | 0.121  | 0.015           | 0.107  | 0.079           | 0.053  |
| CAP45.2.00.G3       | C       | >30     | >30    | >30    | >30    | 1.947           | 26.265 | 1.188           | 0.058  | X1193_c1                                                  | G              | 0.141   | 0.790  | 0.026  | 0.078  | 0.025           | 0.114  | 0.017           | -0.165 |
| CAP210.2.00.E8      | C       | >30     | >30    | >30    | >30    | 4.888           | >30    | 0.788           | ND     | R0402_c2_11                                               | G              | 0.197   | 0.936  | 0.013  | 0.040  | 0.014           | 0.043  | -0.032          | -0.031 |
| HIV-001428-2.42     | C       | >30     | >30    | 0.037  | 0.125  | 0.034           | 0.119  | 0.037           | 0.021  | X1254_c3                                                  | G              | 3.331   | 12.566 | 0.033  | 0.094  | 0.043           | 0.118  | -0.115          | -0.099 |
| HIV-0013095-2.11    | C       | 0.168   | 0.612  | >30    | >30    | 0.192           | 0.694  | -0.058          | -0.055 | X2088_c9                                                  | G              | >30     | >30    | >30    | >30    | 5.092           | >30    | 0.770           | ND     |
| HIV-16055-2.3       | C       | 10.158  | >30    | >30    | >30    | 7.924           | >30    | 0.108           | ND     | X2131_C1_B5                                               | G              | 0.382   | 2.544  | 0.027  | 0.099  | 0.022           | 0.081  | 0.089           | 0.087  |
| HIV-16845-2.22      | C       | 2.223   | 14.223 | 0.183  | 0.670  | 0.089           | 0.332  | 0.313           | 0.305  | P1981_C5_3                                                | G              | 0.261   | 0.878  | 0.027  | 0.182  | 0.025           | 0.069  | 0.033           | 0.421  |
| Ce1086_B2           | C (T/F) | 4.899   | >30    | >30    | >30    | 0.468           | 4.293  | 1.020           | 0.844  | X1632_S2_B10                                              | G              | 0.194   | 1.440  | >30    | >30    | 0.280           | 2.218  | -0.159          | -0.188 |
| Ce0393_C3           | C (T/F) | 4.574   | >30    | >30    | >30    | 8.026           | >30    | -0.244          | ND     | 3016.v5.c45                                               | D              | 0.175   | 0.843  | >30    | >30    | 0.347           | 1.745  | 0.297           | -0.316 |
| Ce1176_A3           | C (T/F) | 2.411   | 10.873 | 0.019  | 0.047  | 0.024           | 0.070  | -0.101          | -0.173 | A07412M1.vrc12                                            | D              | 1.117   | 9.467  | 24.920 | >30    | 0.125           | 0.818  | 0.851           | 1.063  |
| Ce2010_F5           | C (T/F) | >30     | >30    | >30    | >30    | >30             | >30    | ND              | ND     | 231965.c01                                                | D              | 0.371   | 1.369  | >30    | >30    | 0.342           | 1.241  | 0.035           | 0.049  |
| Ce0682_E4           | C (T/F) | 0.077   | 0.565  | >30    | >30    | 0.077           | 0.520  | 0.000           | 0.036  | 231966.c02                                                | D              | 0.646   | 2.304  | 5.107  | 29.181 | 0.071           | 0.314  | 0.959           | 0.866  |
| Ce1172_H1           | C (T/F) | 25.431  | >30    | 0.015  | 0.044  | 0.029           | 0.079  | -0.286          | -0.254 | 191821_E6_1                                               | D (T/F)        | 0.099   | 0.571  | 0.016  | 0.068  | 0.016           | 0.075  | 0.000           | -0.043 |
| Ce2060_G9           | C (T/F) | 1.695   | 11.108 | >30    | >30    | 0.483           | 2.275  | 0.545           | 0.689  | 3817.v2.c59                                               | CD             | 0.379   | 1.471  | 0.023  | 0.094  | 0.039           | 0.118  | -0.229          | -0.099 |
| Ce703010054_2A2     | C (T/F) | 8.789   | >30    | >30    | >30    | 9.749           | >30    | 0.045           | ND     | 6480.v4.c25                                               | CD             | 0.156   | 1.000  | 0.012  | 0.061  | 0.020           | 0.091  | -0.222          | -0.174 |
| BF1266.431a         | C (T/F) | >30     | >30    | >30    | >30    | >30             | >30    | ND              | ND     | 6952.v1.c20                                               | CD             | 0.556   | 3.141  | >30    | >30    | 0.500           | 2.616  | 0.046           | 0.079  |
| 246F_C1G            | C (T/F) | 21.211  | >30    | 0.007  | 0.020  | 0.011           | 0.033  | -0.198          | -0.217 | 6811.v7.c18                                               | CD             | 4.808   | 19.816 | 0.018  | 0.079  | 0.016           | 0.052  | 0.051           | 0.182  |
| 249M_B10            | C (T/F) | 1.599   | 7.988  | 0.032  | 0.092  | 0.020           | 0.085  | 0.204           | 0.151  | 89-F1_2_25                                                | CD             | >30     | >30    | >30    | >30    | >30             | >30    | ND              | ND     |
| ZM247v1 (Rev.)      | C (T/F) | 1.079   | 5.380  | 0.014  | 0.034  | 0.011           | 0.042  | 0.105           | -0.092 | 3301.v1.c24                                               | AC             | >30     | >30    | 0.224  | 1.296  | 0.097           | 0.359  | 0.363           | 0.558  |
| T030102001E3 (Rev.) | C (T/F) | >30     | >30    | 0.033  | 0.085  | 0.020           | 0.087  | 0.217           | -0.010 | 6041.v3.c23                                               | AC             | >30     | >30    | >30    | >30    | 13.831          | >30    | 0.336           | ND     |
| 1394C931 (Rev.)     | C (T/F) | >30     | >30    | 0.027  | 0.082  | 0.030           | 0.114  | -0.046          | -0.143 | 6540.v4.c1                                                | AC             | >30     | >30    | 6.596  | >30    | 0.257           | 1.661  | 1.409           | 1.257  |
| Ce704809221_1B3     | C (T/F) | 0.367   | 3.003  | 0.036  | 0.136  | 0.024           | 0.117  | 0.176           | 0.065  | 6545.v4.c1                                                | AC             | >30     | >30    | >30    | >30    | >30             | >30    | ND              | ND     |
| CNE19               | BC      | 0.280   | 1.889  | >30    | >30    | 0.150           | 1.059  | 0.271           | 0.251  | 0815.v3.c3                                                | ACD            | 0.746   | 9.202  | 0.038  | 0.170  | 0.036           | 0.234  | 0.023           | -0.139 |
| CNE20               | BC      | 0.833   | 3.879  | 0.005  | 0.011  | 0.007           | 0.017  | -0.146          | -0.189 | 3103.v3.c10                                               | ACD            | >30     | >30    | 0.014  | 0.053  | 0.045           | 0.126  | -0.507          | -0.376 |
| CNE21               | BC      | 0.311   | 2.260  | 0.009  | 0.028  | 0.013           | 0.041  | -0.160          | -0.166 | <b>Total Viruses 116 116 116 116 116 116</b>              |                |         |        |        |        |                 |        |                 |        |
| CNE17               | BC      | 2.555   | 9.747  | 0.456  | 1.618  | 0.227           | 0.742  | 0.303           | 0.339  | <b>%Breadth 65.5 56.9 65.5 58.6 90.5 81.9</b>             |                |         |        |        |        |                 |        |                 |        |
| CNE30               | BC      | 7.120   | >30    | 0.927  | 8.819  | 0.161           | 0.736  | 0.760           | 1.079  | <b>Geometric mean 0.645 2.373 0.068 0.164 0.084 0.237</b> |                |         |        |        |        |                 |        |                 |        |
| CNE52               | BC      | 0.879   | 8.534  | >30    | >30    | 0.198           | 1.685  | 0.647           | 0.705  |                                                           |                |         |        |        |        |                 |        |                 |        |
| CNE53               | BC      | >30     | >30    | 0.027  | 0.082  | 0.030           | 0.114  | -0.046          | -0.143 |                                                           |                |         |        |        |        |                 |        |                 |        |
| CNE58               | BC      | >30     | >30    | 5.236  | >30    | 0.320           | 1.621  | 1.214           | 1.267  |                                                           |                |         |        |        |        |                 |        |                 |        |
| MS208_A1            | A       | >30     | >30    | >30    | >30    | >30             | >30    | ND              | ND     |                                                           |                |         |        |        |        |                 |        |                 |        |
| Q23.17              | A       | 0.291   | 1.405  | 0.018  | 0.050  | 0.016           | 0.045  | 0.051           | 0.046  |                                                           |                |         |        |        |        |                 |        |                 |        |
| Q481.e2             | A       | 0.925   | 3.292  | >30    | >30    | 0.128           | 0.441  | 0.859           | 0.873  |                                                           |                |         |        |        |        |                 |        |                 |        |
| Q769.d22            | A       | 0.083   | 0.600  | >30    | >30    | 0.111           | 1.081  | -0.077          | -0.256 |                                                           |                |         |        |        |        |                 |        |                 |        |

*In vitro* neutralization activity was determined by standardized TZM-bl assay.

IC<sub>50</sub> and IC<sub>80</sub> values are expressed as µg/ml.

Fold change values were calculated by dividing the IC

**Table S9:** Comparison of the *in vitro* neutralization activity of IgG3C- hinge variants of PGT151 and 10-1074 mAbs and PGT151/10-1074 biNAb. **Related to Figure 5.**

| Virus ID           | Clade   | PGT151/ 10-1074 |        |         |        |                 |       |             |        | Fold Change     | Log            | Virus ID | Clade | PGT151/ 10-1074 |       |         |        |                 |        |             |     | Fold Change | Log |
|--------------------|---------|-----------------|--------|---------|--------|-----------------|-------|-------------|--------|-----------------|----------------|----------|-------|-----------------|-------|---------|--------|-----------------|--------|-------------|-----|-------------|-----|
|                    |         | PGT151          |        | 10-1074 |        | PGT151/ 10-1074 |       | Fold Change | Log    |                 |                |          |       | PGT151          |       | 10-1074 |        | PGT151/ 10-1074 |        | Fold Change | Log |             |     |
|                    |         | IC50            | IC80   | IC50    | IC80   | IC50            | IC80  |             |        |                 |                |          |       | IC50            | IC80  | IC50    | IC80   | IC50            | IC80   |             |     |             |     |
| 6535.3             | B       | 0.007           | 0.017  | 0.010   | 0.030  | 0.003           | 0.017 | 0.368       | 0.000  | Q461.e2         | A              | 5.020    | >30   | >30             | >30   | 0.471   | 6.895  | 1.028           | 0.639  |             |     |             |     |
| QH0692.42          | B       | 0.029           | 0.572  | 0.090   | 0.346  | 0.019           | 0.079 | 0.184       | 0.641  | Q769.d22        | A              | >30      | >30   | >30             | >30   | >30     | >30    | ND              | ND     |             |     |             |     |
| SC422661.8         | B       | 0.013           | 0.044  | 0.053   | 0.263  | 0.014           | 0.058 | -0.032      | -0.120 | Q259.d2.17      | A              | 1.547    | >30   | >30             | >30   | 0.237   | 8.243  | 0.815           | 0.561  |             |     |             |     |
| PVQ.4              | B       | 0.029           | 6.403  | 0.050   | 0.236  | 0.020           | 0.094 | 0.161       | 0.400  | Q842.d12        | A              | 0.008    | 0.028 | >30             | >30   | 0.028   | 0.075  | -0.544          | -0.428 |             |     |             |     |
| TRQ.11             | B       | >30             | >30    | 0.024   | 0.099  | 0.042           | 0.121 | -0.243      | -0.087 | 3415.v1.c1      | A              | 0.004    | 0.014 | >30             | >30   | 0.010   | 0.037  | -0.398          | -0.422 |             |     |             |     |
| AC10.0.29          | B       | 0.008           | 0.036  | 0.018   | 0.093  | 0.016           | 0.055 | -0.301      | -0.184 | 3365.v2.c2      | A              | 0.012    | 0.042 | 0.118           | 0.339 | 0.025   | 0.090  | -0.319          | -0.331 |             |     |             |     |
| RHPA4259.7         | B       | 0.012           | 0.058  | 0.031   | 0.115  | 0.014           | 0.061 | -0.067      | -0.022 | 191955.A11      | A (T/F)        | 0.005    | 0.016 | >30             | >30   | 0.025   | 0.111  | -0.699          | -0.841 |             |     |             |     |
| THRO4156.18        | B       | >30             | >30    | >30     | >30    | >30             | >30   | ND          | ND     | 191084.B7.19    | A (T/F)        | 0.004    | 0.019 | 0.045           | 0.176 | 0.006   | 0.026  | -0.176          | -0.136 |             |     |             |     |
| REJO4541.67        | B       | 0.043           | 0.355  | >30     | >30    | 0.071           | 0.367 | -0.218      | -0.014 | 9004SS.A3.4     | A (T/F)        | 0.008    | 0.020 | 0.019           | 0.062 | 0.011   | 0.034  | -0.138          | -0.230 |             |     |             |     |
| TRJO4551.58        | B       | 0.951           | 7.935  | 0.493   | 2.332  | 0.366           | 1.579 | 0.129       | 0.169  | T257.31         | CRF02.AG       | 0.005    | 0.019 | >30             | >30   | 0.015   | 0.052  | -0.477          | -0.437 |             |     |             |     |
| WITO4160.33        | B       | 0.007           | 0.061  | 0.178   | 1.858  | 0.014           | 0.053 | -0.301      | 0.061  | 928-28          | CRF02.AG       | >30      | >30   | 0.419           | 2.743 | 0.164   | 2.231  | 0.407           | 0.090  |             |     |             |     |
| CAAN5342.A2        | B       | 0.008           | 0.031  | 0.013   | 0.043  | 0.004           | 0.020 | 0.301       | 0.190  | 263-8           | CRF02.AG       | >30      | >30   | 0.409           | 2.693 | 1.941   | 10.999 | -0.676          | -0.611 |             |     |             |     |
| YU2.DG             | B       | >30             | >30    | 0.121   | 0.568  | 0.100           | 0.464 | 0.083       | 0.088  | T250.4          | CRF02.AG       | 0.004    | 0.012 | 0.002           | 0.007 | 0.002   | 0.007  | 0.000           | 0.000  |             |     |             |     |
| WEAU.d15.410.787   | B (T/F) | 0.032           | >30    | 0.054   | 0.239  | 0.010           | 0.037 | 0.505       | 0.810  | T251.18         | CRF02.AG       | 0.101    | 1.716 | 0.284           | 1.412 | 0.055   | 0.196  | 0.264           | 0.858  |             |     |             |     |
| 1006.11.C3.1601    | B (T/F) | 1.467           | >30    | 0.001   | 0.005  | 0.007           | 0.028 | -0.845      | -0.748 | 19185-50        | CRF02.AG       | 0.085    | 2.496 | 1.228           | 5.624 | 0.096   | 0.423  | -0.053          | 0.771  |             |     |             |     |
| 1054.07.TC4.1499   | B (T/F) | 0.004           | 0.029  | 0.023   | 0.161  | 0.010           | 0.043 | -0.398      | -0.171 | T255.34         | CRF02.AG       | 0.006    | 0.017 | 11.186          | >30   | 0.009   | 0.027  | -0.176          | -0.201 |             |     |             |     |
| 1056.10.TA11.1826  | B (T/F) | 0.012           | 0.058  | 0.034   | 0.244  | 0.019           | 0.070 | -0.200      | -0.082 | 211-9           | CRF02.AG       | 0.005    | 0.022 | 0.173           | 0.595 | 0.014   | 0.037  | -0.447          | -0.226 |             |     |             |     |
| 1012.11.TC21.3257  | B (T/F) | >30             | >30    | 0.013   | 0.059  | 0.078           | 0.276 | -0.778      | -0.670 | 235-47          | CRF02.AG       | 0.057    | >30   | 0.065           | 0.221 | 0.032   | 0.116  | 0.308           | 0.280  |             |     |             |     |
| 6240.08.TA5.4622   | B (T/F) | 0.101           | 1.199  | 0.102   | 0.353  | 0.077           | 0.210 | 0.113       | 0.226  | B20345.c01      | CRF01.AE       | >30      | >30   | >30             | >30   | 0.605   | 14.553 | 1.695           | 0.314  |             |     |             |     |
| 6244.13.B5.4576    | B (T/F) | >30             | >30    | 0.240   | 0.782  | 0.095           | 0.418 | 0.402       | 0.272  | CNE8            | CRF01.AE       | >30      | >30   | >30             | >30   | 1.816   | >30    | 1.218           | ND     |             |     |             |     |
| 62357.14.D3.4589   | B (T/F) | 0.005           | 0.031  | 1.290   | 26.818 | 0.011           | 0.044 | -0.342      | -0.152 | C1080.c03       | CRF01.AE       | >30      | >30   | >30             | >30   | 8.094   | >30    | 0.569           | ND     |             |     |             |     |
| SC05.8C11.2344     | B (T/F) | 0.022           | 0.246  | 0.037   | 0.112  | 0.031           | 0.112 | -0.149      | 0.000  | R2184.c04       | CRF01.AE       | >30      | >30   | >30             | >30   | >30     | >30    | ND              | ND     |             |     |             |     |
| Du156.12           | C       | 0.010           | 0.030  | 0.022   | 0.100  | 0.019           | 0.052 | -0.279      | -0.298 | R1166.c01       | CRF01.AE       | >30      | >30   | >30             | >30   | >30     | >30    | ND              | ND     |             |     |             |     |
| Du172.17           | C       | 0.003           | 0.020  | 0.086   | 0.303  | 0.013           | 0.038 | -0.637      | -0.273 | R3265.c06       | CRF01.AE       | >30      | >30   | >30             | >30   | >30     | >30    | ND              | ND     |             |     |             |     |
| Du1422.1           | C       | 0.185           | >30    | 0.078   | 0.203  | 0.051           | 0.178 | 0.185       | 0.057  | C2101.c01       | CRF01.AE       | >30      | >30   | >30             | >30   | >30     | >30    | ND              | ND     |             |     |             |     |
| ZM197M.PB7         | C       | 0.001           | 0.021  | >30     | >30    | 0.026           | 0.115 | -1.416      | -0.730 | C3347.c11       | CRF01.AE       | >30      | >30   | >30             | >30   | >30     | >30    | ND              | ND     |             |     |             |     |
| ZM144M.PL15        | C       | 0.009           | 0.118  | 0.077   | 0.066  | 0.011           | 0.074 | -0.087      | 0.203  | C4118.c09       | CRF01.AE       | >30      | >30   | >30             | >30   | 5.957   | >30    | 0.732           | ND     |             |     |             |     |
| ZM233M.PB6         | C       | 0.015           | 0.225  | 0.054   | 0.202  | 0.012           | 0.049 | 0.097       | 0.615  | CNE5            | CRF01.AE       | >30      | >30   | >30             | >30   | >30     | >30    | ND              | ND     |             |     |             |     |
| ZM249M.PL1         | C       | 0.008           | 0.025  | >30     | >30    | 0.021           | 0.063 | -0.419      | -0.401 | BJOX009000.02.4 | CRF01.AE       | >30      | >30   | >30             | >30   | >30     | >30    | ND              | ND     |             |     |             |     |
| ZM53M.PB12         | C       | >30             | >30    | >30     | >30    | >30             | >30   | ND          | ND     | BJOX015000.11.5 | CRF01.AE (T/F) | >30      | >30   | >30             | >30   | >30     | >30    | ND              | ND     |             |     |             |     |
| ZM109F.PB4         | C       | 0.744           | >30    | >30     | >30    | 0.358           | >30   | 0.318       | ND     | BJOX010000.06.2 | CRF01.AE (T/F) | >30      | >30   | >30             | >30   | >30     | >30    | ND              | ND     |             |     |             |     |
| ZM135M.PL10a       | C       | 0.004           | 0.017  | >30     | >30    | 0.024           | 0.078 | -0.778      | -0.662 | BJOX025000.01.1 | CRF01.AE (T/F) | >30      | >30   | >30             | >30   | >30     | >30    | ND              | ND     |             |     |             |     |
| CAP45.2.00.G3      | C       | 0.005           | 0.033  | >30     | >30    | 0.026           | 0.166 | -0.716      | -0.702 | BJOX028000.10.3 | CRF01.AE (T/F) | >30      | >30   | >30             | >30   | 4.719   | >30    | 0.803           | ND     |             |     |             |     |
| CAP210.2.00.E8     | C       | 0.022           | 0.488  | 20.730  | >30    | 0.042           | 0.242 | -0.281      | 0.305  | X1193.c1        | G              | 0.013    | 0.049 | 0.114           | 0.354 | 0.020   | 0.053  | -0.187          | -0.034 |             |     |             |     |
| HIV-001428-2.42    | C       | 0.058           | >30    | 0.056   | 0.189  | 0.024           | 0.079 | 0.368       | 0.379  | P0402.c2.11     | G              | 0.005    | 0.020 | 0.015           | 0.067 | 0.007   | 0.022  | -0.146          | -0.041 |             |     |             |     |
| HIV-0013095-2.11   | C       | 0.025           | >30    | 5.293   | >30    | 0.033           | 0.287 | -0.121      | 2.019  | X1254.c3        | G              | 2.142    | >30   | 0.220           | 0.690 | 0.040   | 0.152  | 0.740           | 0.657  |             |     |             |     |
| HIV-16055-2.3      | C       | 0.096           | >30    | >30     | >30    | 0.104           | 0.846 | -0.035      | 1.550  | X2088.c9        | G              | >30      | >30   | 0.004           | 0.017 | 0.031   | 0.085  | -0.889          | -0.699 |             |     |             |     |
| HIV-16845-2.22     | C       | >30             | >30    | 0.862   | 3.053  | 0.105           | 0.792 | 0.914       | 0.586  | X2131.C1.B5     | G              | 0.012    | 0.050 | 0.029           | 0.062 | 0.010   | 0.033  | 0.079           | 0.180  |             |     |             |     |
| Ce1086.B2          | C (T/F) | 0.069           | 11.107 | >30     | >30    | 0.093           | 0.881 | -0.130      | 1.101  | P1981.C5.3      | G              | 0.075    | >30   | 0.008           | 0.023 | 0.008   | 0.031  | 0.000           | -0.130 |             |     |             |     |
| Ce0393.C3          | C (T/F) | >30             | >30    | >30     | >30    | >30             | >30   | ND          | ND     | X1632.S2.B10    | G              | 0.092    | >30   | >30             | >30   | 0.113   | 3.154  | 0.089           | 0.978  |             |     |             |     |
| Ce1176.A3          | C (T/F) | 0.003           | 0.016  | 0.026   | 0.094  | 0.007           | 0.022 | -0.368      | -0.138 | 3016.v5.c45     | D              | 0.478    | >30   | >30             | >30   | 0.800   | >30    | -0.224          | ND     |             |     |             |     |
| Ce2010.F5          | C (T/F) | >30             | >30    | >30     | >30    | >30             | >30   | ND          | ND     | A07412M1.vrc12  | D              | 0.098    | 2.708 | 0.014           | 0.052 | 0.024   | 0.088  | -0.234          | -0.228 |             |     |             |     |
| Ce0682.E4          | C (T/F) | >30             | >30    | >30     | >30    | 6.882           | >30   | 0.639       | ND     | 231965.c01      | D              | 0.011    | 0.042 | >30             | >30   | 0.021   | 0.074  | 0.281           | -0.246 |             |     |             |     |
| Ce1172.H1          | C (T/F) | >30             | >30    | 0.060   | 0.210  | 0.632           | 1.642 | -1.023      | -0.893 | 231966.c02      | D              | 0.077    | 0.333 | >30             | >30   | 0.181   | 0.688  | -0.371          | -0.315 |             |     |             |     |
| Ce2060.G9          | C (T/F) | 0.120           | >30    | 13.310  | >30    | 0.079           | 0.772 | 0.182       | 1.590  | 191821.E6.1     | D (T/F)        | 0.203    | 1.768 | >30             | >30   | 0.197   | 1.523  | 0.013           | 0.065  |             |     |             |     |
| Ce703010054.2A2    | C (T/F) | 0.023           | 0.157  | >30     | >30    | 0.051           | 0.304 | -0.346      | -0.287 | 3817.v2.c59     | CD             | >30      | >30   | 1.255           | 6.718 | 6.171   | >30    | -0.692          | -0.650 |             |     |             |     |
| BF1266.431a        | C (T/F) | >30             | >30    | >30     | >30    | >30             | >30   | ND          | ND     | 6480.v4.c25     | CD             | >30      | >30   | 0.011           | 0.058 | 0.035   | 0.120  | -0.503          | -0.316 |             |     |             |     |
| 246F.C1G           | C (T/F) | 13.267          | >30    | 0.051   | 0.144  | 0.056           | 0.269 | -0.041      | -0.271 | 6952.v1.c20     | CD             | 1.076    | >30   | 0.009           | 0.042 | 0.043   | 0.195  | -0.679          | -0.667 |             |     |             |     |
| 249M.B10           | C (T/F) | 0.007           | 0.029  | >30     | >30    | 0.019           | 0.068 | -0.434      | -0.370 | 6811.v7.c18     | CD             | >30      | >30   | 0.002           | 0.009 | 0.005   | 0.025  | -0.398          | -0.444 |             |     |             |     |
| ZM247v1(Rev-)      | C (T/F) | 0.013           | >30    | 0.037   | 0.110  | 0.010           | 0.045 | 0.114       | 0.388  | 89-F1.2.25      | CD             | >30      | >30   | >30             | >30   | >30     | >30    | ND              | ND     |             |     |             |     |
| 7030102001E5(Rev-) | C (T/F) | 0.003           | 0.016  | 0.008   | 0.028  | 0.008           | 0.016 | -0.301      | 0.000  | 3301.v1.c24     | AC             | 0.018    | 0.083 | 0.021           | 0.069 | 0.014   | 0.042  | 0.109           | 0.216  |             |     |             |     |
| 1394C9G1(Rev-)     | C (T/F) | 0.023           | 0.252  | 0.041   | 0.143  | 0.020           | 0.073 | 0.061       | 0.310  | 6041.v3.c23     | AC             | 0.011    | 0.044 | >30             | >30   | 0.026   | 0.094  | -0.374          | -0.340 |             |     |             |     |
| Ce704809221.1B3    | C (T/F) | >30             | >30    | 0.079   | 0.687  | 0.192           | 0.670 | -0.388      | 0.011  | 6545.v4.c1      | AC             | 0.008    | 0.039 | >30             | >30   | 0.022   | 0.086  | -0.439          | -0.333 |             |     |             |     |
| CNE19              | BC      | 0.008           | 0.167  | 0.078   | >30    | 0.008           | 0.036 | 0.000       | 0.666  | 0815.v3.c3      | ACD            | 13.652   | >30   | 0.038           | 0.231 | 0.061   | 0.254  | -0.206          | -0.041 |             |     |             |     |
| CNE20              | BC      | >30             | >30    | 0.003   | 0.010  | 0.010           | 0.032 | -0.523      | -0.505 | 3103.v3.c10     | ACD            | 0.055    | 1.232 | 0.051           | 0.141 | 0.027   | 0.096  | 0.276           | 0.167  |             |     |             |     |
| CNE21              | BC      | 0.004           | 0.012  | 0.050   | 0.198  | 0.008           | 0.032 | -0.301      | -0.428 |                 |                |          |       |                 |       |         |        |                 |        |             |     |             |     |
| CNE17              | BC      | 0.019           | 13.704 | 1.279   | 6.471  | 0.030           | 0.150 | -0.198      | 1.639  |                 |                |          |       |                 |       |         |        |                 |        |             |     |             |     |
| CNE30              | BC      | >30             | >30    | 0.356   | 1.243  | 0.086           | 0.430 | 0.617       | 0.461  |                 |                |          |       |                 |       |         |        |                 |        |             |     |             |     |
| CNE52              | BC      | 0.013           | 0.064  | 1.534   | 9.005  | 0.014           | 0.075 | -0.032      | -0.069 |                 |                |          |       |                 |       |         |        |                 |        |             |     |             |     |
| CNE53              | BC</    |                 |        |         |        |                 |       |             |        |                 |                |          |       |                 |       |         |        |                 |        |             |     |             |     |

**Table S10:** Comparison of the *in vitro* neutralization activity of IgG3C- hinge variants of 3BNC117 and PGT135 mAbs and 3BNC117/PGT135 biNAb. **Related to Figure 5.**

| Virus ID           | Clade   | 3BNC117/ PGT135 |        |        |        | Fold Change |       |        |        |
|--------------------|---------|-----------------|--------|--------|--------|-------------|-------|--------|--------|
|                    |         | 3BNC117         |        | PGT135 |        | Log         |       | IC50   |        |
|                    |         | IC50            | IC80   | IC50   | IC80   | IC50        | IC80  | IC50   | IC80   |
| 6535.3             | B       | 0.599           | 5.030  | >30    | >30    | 0.051       | 0.405 | 1.070  | 1.094  |
| QH0692.42          | B       | 0.146           | 0.514  | >30    | >30    | 0.017       | 0.218 | 0.934  | 0.373  |
| SC422661.8         | B       | 0.056           | 0.251  | 7.753  | >30    | 0.009       | 0.063 | 0.786  | 0.600  |
| PV04               | B       | 0.027           | 0.125  | >30    | >30    | 0.015       | 0.093 | 0.255  | 0.128  |
| TRO.11             | B       | 0.072           | 0.203  | 0.049  | 0.143  | 0.018       | 0.067 | 0.435  | 0.329  |
| AC10.0.29          | B       | >30             | >30    | >30    | >30    | 3.149       | >30   | 0.979  | ND     |
| RHPA4259.7         | B       | 0.023           | 0.069  | >30    | >30    | 0.009       | 0.045 | 0.407  | 0.186  |
| THRO4156.18        | B       | 3.909           | 16.176 | >30    | >30    | 0.249       | 0.203 | 1.196  | 0.903  |
| REJO4541.67        | B       | 0.040           | 0.228  | >30    | >30    | 0.015       | 0.093 | 0.426  | 0.389  |
| TRJO4551.58        | B       | 0.193           | 0.676  | >30    | >30    | 0.019       | 0.154 | 1.007  | 0.642  |
| WITO4160.33        | B       | 0.027           | 0.104  | >30    | >30    | 0.016       | 0.057 | 0.227  | 0.261  |
| CAANS42A.2         | B       | 0.646           | 2.512  | 3.421  | 26.634 | 0.061       | 0.313 | 1.025  | 0.904  |
| YU2.DG             | B       | 0.031           | 0.086  | 16.810 | >30    | 0.014       | 0.074 | 0.345  | 0.089  |
| WEAU_d15_410_787   | B (T/F) | 0.065           | 0.335  | 0.208  | 1.782  | 0.017       | 0.084 | 0.582  | 0.601  |
| 1006_11_C3_1601    | B (T/F) | 0.048           | 0.173  | >30    | >30    | 0.016       | 0.068 | 0.477  | 0.406  |
| 1054_07_TC4_1499   | B (T/F) | 0.127           | 0.534  | >30    | >30    | 0.019       | 0.098 | 0.825  | 0.736  |
| 1056_10_TA11_1826  | B (T/F) | 0.196           | 3.113  | >30    | >30    | 0.050       | 0.349 | 0.593  | 0.950  |
| 1072_11_TC21_3257  | B (T/F) | 0.016           | 0.084  | 26.241 | >30    | 0.009       | 0.048 | 0.250  | 0.243  |
| 6240_08_TA5_4622   | B (T/F) | 0.688           | 1.814  | >30    | >30    | 0.053       | 0.237 | 1.113  | 0.884  |
| 6244_13_B5_4576    | B (T/F) | 0.109           | 0.342  | 0.530  | 2.397  | 0.020       | 0.073 | 0.366  | 0.671  |
| 62357_14_D3_4589   | B (T/F) | 0.066           | 0.438  | >30    | >30    | 0.019       | 0.099 | 0.541  | 0.646  |
| SC05_8C11_2344     | B (T/F) | 0.225           | 0.752  | 5.363  | >30    | 0.015       | 0.523 | 0.173  | 0.158  |
| Du156.12           | C       | 0.114           | 0.459  | >30    | >30    | 0.067       | 0.290 | 0.231  | 0.199  |
| Du172.17           | C       | 1.348           | 12.316 | >30    | >30    | 0.375       | 1.354 | 0.556  | 0.959  |
| Zu422.1            | C       | >30             | >30    | >30    | >30    | >30         | >30   | ND     | ND     |
| Dm197M.PB7         | C       | 0.527           | 1.810  | >30    | >30    | 0.039       | 0.196 | 1.131  | 0.965  |
| ZM214M.PL15        | C       | 0.119           | 0.785  | >30    | >30    | 0.024       | 0.113 | 0.695  | 0.842  |
| ZM233M.PB6         | C       | 0.445           | 1.570  | 0.439  | 9.943  | 0.033       | 0.118 | 1.124  | 1.124  |
| ZM249M.PL1         | C       | 0.079           | 0.363  | >30    | >30    | 0.026       | 0.127 | 0.483  | 0.456  |
| ZM53M.PB12         | C       | 0.363           | 1.738  | >30    | >30    | 0.063       | 0.310 | 0.761  | 0.749  |
| ZM109F.PB4         | C       | 0.250           | 1.459  | >30    | >30    | 0.031       | 0.231 | 0.907  | 0.800  |
| ZM135M.PL10a       | C       | 0.121           | 0.538  | >30    | >30    | 0.021       | 0.075 | 0.761  | 0.856  |
| CAP45.2.00.G3      | C       | 16.693          | >30    | >30    | >30    | 0.031       | 0.676 | 2.729  | 1.647  |
| CAP210.2.00.E8     | C       | >30             | >30    | >30    | >30    | 0.368       | 3.729 | 1.911  | 0.906  |
| HIV-001428.2.42    | C       | 0.009           | 0.026  | 0.051  | 0.228  | 0.003       | 0.015 | 0.477  | 0.239  |
| HIV-001305.2.11    | C       | 0.830           | 7.653  | >30    | >30    | 0.024       | 0.131 | 1.539  | 1.767  |
| HIV-18055.2.3      | C       | >30             | >30    | >30    | >30    | 0.063       | >30   | 2.678  | ND     |
| HIV-18845.2.22     | C       | >30             | >30    | 10.984 | >30    | 0.176       | 2.873 | 1.795  | 1.019  |
| Ce1086_B2          | C (T/F) | 0.190           | 0.888  | >30    | >30    | 0.037       | 0.242 | 0.711  | 0.565  |
| Ce0393_C3          | C (T/F) | 0.267           | 1.260  | >30    | >30    | 0.032       | 0.155 | 0.921  | 0.810  |
| Ce1176_A3          | C (T/F) | 0.246           | 1.236  | 11.617 | >30    | 0.022       | 0.109 | 1.049  | 1.055  |
| Ce2010_F5          | C (T/F) | 0.076           | 0.272  | >30    | >30    | 0.014       | 0.067 | 0.735  | 0.608  |
| Ce0682_E4          | C (T/F) | 0.050           | 0.145  | >30    | >30    | 0.014       | 0.061 | 0.553  | 0.376  |
| Ce1172_H1          | C (T/F) | >30             | >30    | >30    | >30    | >30         | >30   | ND     | ND     |
| Ce2060_G9          | C (T/F) | 0.235           | 0.815  | >30    | >30    | 0.029       | 0.108 | 0.909  | 0.878  |
| Ce703010054_2A2    | C (T/F) | 0.306           | 1.547  | >30    | >30    | 0.029       | 0.144 | 1.023  | 1.031  |
| BF1266.431a        | C (T/F) | 0.057           | 0.161  | >30    | >30    | 0.011       | 0.044 | 0.714  | 0.563  |
| 246F_C1G           | C (T/F) | >30             | >30    | >30    | >30    | 0.108       | >30   | 2.444  | ND     |
| 249M_B10           | C (T/F) | 0.077           | 0.402  | >30    | >30    | 0.024       | 0.084 | 0.506  | 0.680  |
| MS247v1(Rev-)      | C (T/F) | >30             | >30    | >30    | >30    | >30         | >30   | ND     | ND     |
| 7030102001E8(Rev-) | C (T/F) | 0.436           | 2.073  | >30    | >30    | 0.047       | 0.210 | 0.967  | 0.994  |
| 1394C9G1(Rev-)     | C (T/F) | >30             | >30    | 0.300  | 4.429  | 0.519       | 3.264 | -0.238 | 0.133  |
| Ce704809221_1B3    | C (T/F) | 0.119           | 0.566  | >30    | >30    | 0.027       | 0.094 | 0.644  | 0.780  |
| CNE19              | BC      | 0.042           | 0.175  | 0.010  | 0.047  | 0.009       | 0.023 | 0.046  | 0.310  |
| CNE20              | BC      | >30             | >30    | 0.007  | 0.020  | 0.051       | 0.145 | -0.862 | -0.860 |
| CNE21              | BC      | >30             | >30    | 0.054  | 0.253  | 0.093       | 0.443 | -0.236 | -0.243 |
| CNE17              | BC      | 12.003          | >30    | >30    | >30    | 0.166       | 0.982 | -1.859 | 1.485  |
| CNE30              | BC      | 0.934           | 3.007  | >30    | >30    | 0.082       | 0.288 | 1.057  | 1.019  |
| CNE52              | BC      | 0.060           | 0.177  | >30    | >30    | 0.017       | 0.065 | 0.548  | 0.435  |
| CNE53              | BC      | 0.463           | 4.250  | 0.140  | 0.580  | 0.039       | 0.128 | 0.555  | 0.656  |
| CNE58              | BC      | 2.196           | 8.574  | >30    | >30    | 0.054       | 0.267 | -1.809 | -1.507 |
| MS208.A1           | A       | 0.111           | 0.480  | 0.771  | 8.551  | 0.027       | 0.092 | 0.614  | 0.717  |
| O23.17             | A       | 0.040           | 0.137  | 20.418 | >30    | 0.014       | 0.040 | 0.456  | 0.535  |

  

| Virus ID        | Clade          | 3BNC117 |        | PGT135 |       | 3BNC117/ PGT135 |        | Fold Change |        |
|-----------------|----------------|---------|--------|--------|-------|-----------------|--------|-------------|--------|
|                 |                | IC50    | IC80   | IC50   | IC80  | IC50            | IC80   | IC50        | IC80   |
| Q461.e2         | A              | 0.133   | 0.445  | >30    | >30   | 0.026           | 0.091  | 0.709       | 0.689  |
| Q769.d22        | A              | 0.023   | 0.095  | >30    | >30   | 0.011           | 0.052  | 0.320       | 0.262  |
| Q259.d2.17      | A              | 0.064   | 0.208  | >30    | >30   | 0.022           | 0.105  | 0.464       | 0.297  |
| Q842.d12        | A              | 0.024   | 0.068  | >30    | >30   | 0.007           | 0.028  | 0.335       | 0.370  |
| 3415.v1.e1      | A              | 0.092   | 0.568  | 0.315  | 2.032 | 0.017           | 0.064  | 0.733       | 0.948  |
| 3365.v2.e2      | A              | 0.062   | 0.170  | 0.222  | 0.837 | 0.017           | 0.065  | 0.562       | 0.418  |
| 191955_A11      | A (T/F)        | >30     | >30    | >30    | >30   | 2.149           | >30    | 1.145       | ND     |
| 191084_B7-19    | A (T/F)        | 0.111   | 0.539  | 0.157  | 1.288 | 0.008           | 0.060  | 1.142       | 0.953  |
| 6004S5_A3_4     | A (T/F)        | 0.121   | 0.545  | >30    | >30   | 0.014           | 0.071  | 0.937       | 0.885  |
| T257-31         | CRF02_AG       | 0.270   | 1.251  | >30    | >30   | 0.028           | 0.171  | 0.984       | 0.864  |
| 928-28          | CRF02_AG       | 0.234   | 1.121  | >30    | >30   | 0.036           | 0.188  | 0.789       | 0.775  |
| 263-8           | CRF02_AG       | 0.071   | 0.212  | >30    | >30   | 0.009           | 0.041  | 0.897       | 0.714  |
| T250-4          | CRF02_AG       | >30     | >30    | >30    | >30   | 8.963           | 28.034 | 0.526       | 0.014  |
| T251-18         | CRF02_AG       | 0.279   | 0.948  | >30    | >30   | 0.028           | 0.113  | 0.998       | 0.924  |
| T276-30         | CRF02_AG       | >30     | >30    | >30    | >30   | >30             | >30    | ND          | ND     |
| T276-24         | CRF02_AG       | 0.132   | 0.455  | >30    | >30   | 0.016           | 0.074  | 0.916       | 0.789  |
| T11-9           | CRF02_AG       | 0.826   | 4.135  | >30    | >30   | 0.115           | 0.520  | 0.856       | 0.900  |
| 235-47          | CRF02_AG       | 0.153   | 1.276  | 6.511  | >30   | 0.010           | 0.050  | 1.009       | 1.293  |
| B20345.c01      | CRF01_AE       | >30     | >30    | >30    | >30   | >30             | >30    | ND          | ND     |
| CNE8            | CRF01_AE       | 0.215   | 0.730  | >30    | >30   | 0.034           | 0.171  | 0.801       | 0.630  |
| C1080.c03       | CRF01_AE       | 0.160   | 0.967  | >30    | >30   | 0.023           | 0.140  | 0.842       | 0.839  |
| R2184.c04       | CRF01_AE       | 0.035   | 0.120  | >30    | >30   | 0.009           | 0.047  | 0.590       | 0.407  |
| R1166.c01       | CRF01_AE       | 0.151   | 2.787  | >30    | >30   | 0.044           | 0.272  | 0.536       | 1.011  |
| R3285.c06       | CRF01_AE       | 0.248   | 0.847  | >30    | >30   | 0.027           | 0.122  | 0.963       | 0.842  |
| C2101.c01       | CRF01_AE       | 0.033   | 0.235  | >30    | >30   | 0.007           | 0.058  | 0.673       | 0.608  |
| C3347.c11       | CRF01_AE       | 0.023   | 0.104  | >30    | >30   | 0.007           | 0.050  | 0.517       | 0.318  |
| C4118.c09       | CRF01_AE       | 0.068   | 0.457  | >30    | >30   | 0.028           | 0.141  | 0.385       | 0.511  |
| CNE5            | CRF01_AE       | 0.482   | 1.728  | >30    | >30   | 0.077           | 0.377  | 0.797       | 0.661  |
| BJOX009000.02.4 | CRF01_AE       | 0.894   | 3.167  | >30    | >30   | 0.086           | 0.412  | 1.017       | 0.866  |
| BJOX015000.11.5 | CRF01_AE (T/F) | 2.722   | 16.450 | >30    | >30   | 0.297           | 2.561  | 0.962       | 0.808  |
| BJOX010000.06.2 | CRF01_AE (T/F) | 0.130   | 0.608  | >30    | >30   | 0.036           | 0.242  | 0.558       | 0.400  |
| BJOX025000.01.1 | CRF01_AE (T/F) | 0.042   | 0.249  | >30    | >30   | 0.012           | 0.090  | 0.544       | 0.442  |
| BJOX028000.10.3 | CRF01_AE (T/F) | 0.010   | 0.054  | >30    | >30   | 0.008           | 0.049  | 0.097       | 0.042  |
| X1193_c1        | G              | 0.066   | 0.325  | 0.055  | 0.249 | 0.017           | 0.065  | 0.510       | 0.583  |
| P0402_c2_11     | G              | 0.110   | 0.392  | >30    | >30   | 0.029           | 0.151  | 0.579       | 0.414  |
| X1254_c3        | G              | 0.204   | 0.560  | 4.107  | >30   | 0.037           | 0.186  | 0.741       | 0.479  |
| X2088_c9        | G              | >30     | >30    | 0.042  | 0.140 | 0.431           | 1.222  | -1.011      | -1.181 |
| X2131_C1_B5     | G              | 0.399   | 2.263  | 0.023  | 0.097 | 0.025           | 0.161  | -0.036      | -0.220 |
| P1981_C5_3      | G              | 1.080   | 6.349  | >30    | >30   | 0.060           | 0.298  | 1.255       | 1.328  |
| X1632_S2_B10    | G              | >30     | >30    | >30    | >30   | 0.020           | 3.078  | 3.176       | 0.989  |
| 3016.v5.e45     | D              | 4.672   | >30    | >30    | >30   | 0.146           | 1.983  | 1.523       | ND     |
| A07412M1.vrc12  | D              | 0.057   | 0.291  | 11.815 | >30   | 0.017           | 0.088  | 0.525       | 0.519  |
| 231965.c01      | D              | 0.122   | 0.556  | >30    | >30   | 0.032           | 0.218  | 0.581       | 0.407  |
| 231966.c02      | D              | 0.643   | 6.279  | >30    | >30   | 0.025           | 0.243  | 1.410       | 1.412  |
| 191821_E6_1     | D (T/F)        | 0.334   | 2.256  | >30    | >30   | 0.033           | 0.152  | 1.005       | 1.171  |
| 3817.v2.c59     | CD             | 0.617   | 2.055  | >30    | >30   | 0.066           | 0.299  | 0.971       | 0.837  |
| 6480.v4.c25     | CD             | 0.042   | 0.197  | 3.782  | >30   | 0.012           | 0.064  | 0.544       | 0.488  |
| 6952.v1.c20     | CD             | 0.203   | 0.889  | 0.043  | 0.288 | 0.044           | 0.213  | -0.010      | 0.131  |
| 6811.v7.e18     | CD             | 0.091   | 0.297  | 0.285  | 4.842 | 0.018           | 0.062  | 0.704       | 0.680  |
| 89-F1_2_25      | CD             | >30     | >30    | >30    | >30   | >30             | >30    | ND          | ND     |
| 3301.v1.c24     | AC             | 0.066   | 0.185  | >30    | >30   | 0.016           | 0.054  | 0.615       | 0.535  |
| 6041.v3.c23     | AC             | 0.031   | 0.204  | >30    | >30   | 0.007           | 0.029  | 0.6         |        |

## Supplemental References

Bournazos, S., Klein, F., Pietzsch, J., Seaman, M.S., Nussenzweig, M.C., and Ravetch, J.V. (2014). Broadly Neutralizing Anti-HIV-1 Antibodies Require Fc Effector Functions for In Vivo Activity. *Cell* 158, 1243-1253.

Klein, F., Halper-Stromberg, A., Horwitz, J.A., Gruell, H., Scheid, J.F., Bournazos, S., Mouquet, H., Spatz, L.A., Diskin, R., Abadir, A., *et al.* (2012). HIV therapy by a combination of broadly neutralizing antibodies in humanized mice. *Nature* 492, 118-122.

Kong, R., Louder, M.K., Wagh, K., Bailer, R.T., deCamp, A., Greene, K., Gao, H., Taft, J.D., Gazumyan, A., Liu, C., *et al.* (2015). Improving neutralization potency and breadth by combining broadly reactive HIV-1 antibodies targeting major neutralization epitopes. *J Virol* 89, 2659-2671.

Merchant, A.M., Zhu, Z., Yuan, J.Q., Goddard, A., Adams, C.W., Presta, L.G., and Carter, P. (1998). An efficient route to human bispecific IgG. *Nat Biotechnol* 16, 677-681.

Montefiori, D.C. (2005). Evaluating neutralizing antibodies against HIV, SIV, and SHIV in luciferase reporter gene assays. *Curr Protoc Immunol* 12, 12.11.

Ridgway, J.B., Presta, L.G., and Carter, P. (1996). 'Knobs-into-holes' engineering of antibody CH3 domains for heavy chain heterodimerization. *Protein Eng* 9, 617-621.

Schaefer, W., Regula, J.T., Böhner, M., Schanzer, J., Croasdale, R., Dürr, H., Gassner, C., Georges, G., Kettenberger, H., Imhof-Jung, S., *et al.* (2011). Immunoglobulin domain crossover as a generic approach for the production of bispecific IgG antibodies. *Proc Natl Acad Sci U S A* 108, 11187-11192.
