# Supplementary material
Source: PubMed Central journal article supplement (PMC4970321)

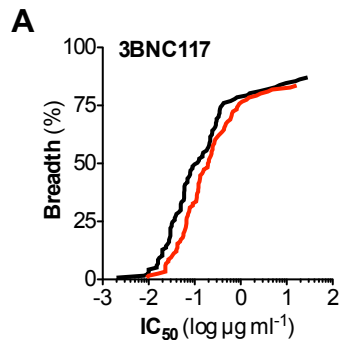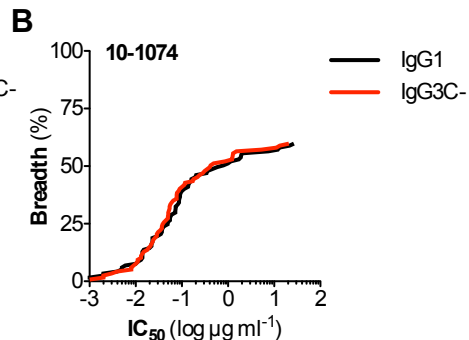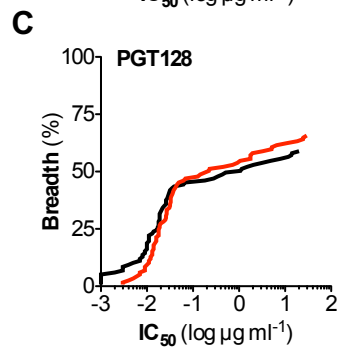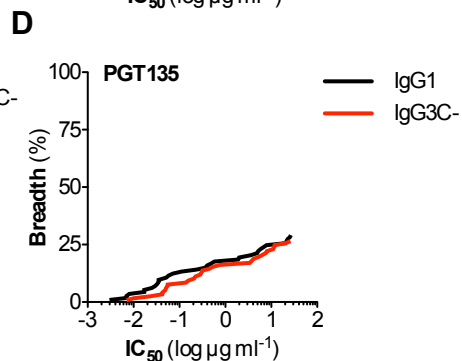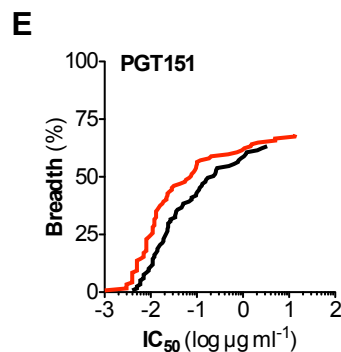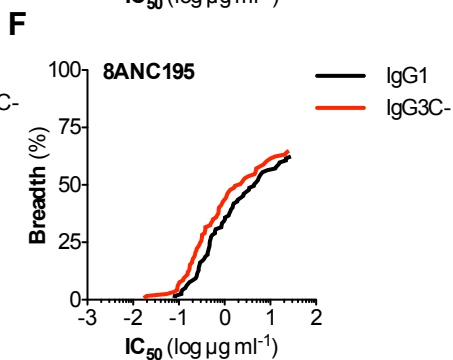

Supplement: NIHMS793677-supplement-02.pdf [file NIHMS793677-supplement-02.pdf]

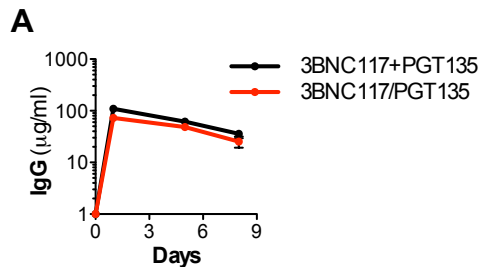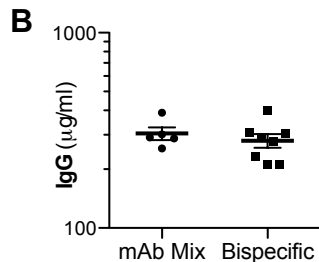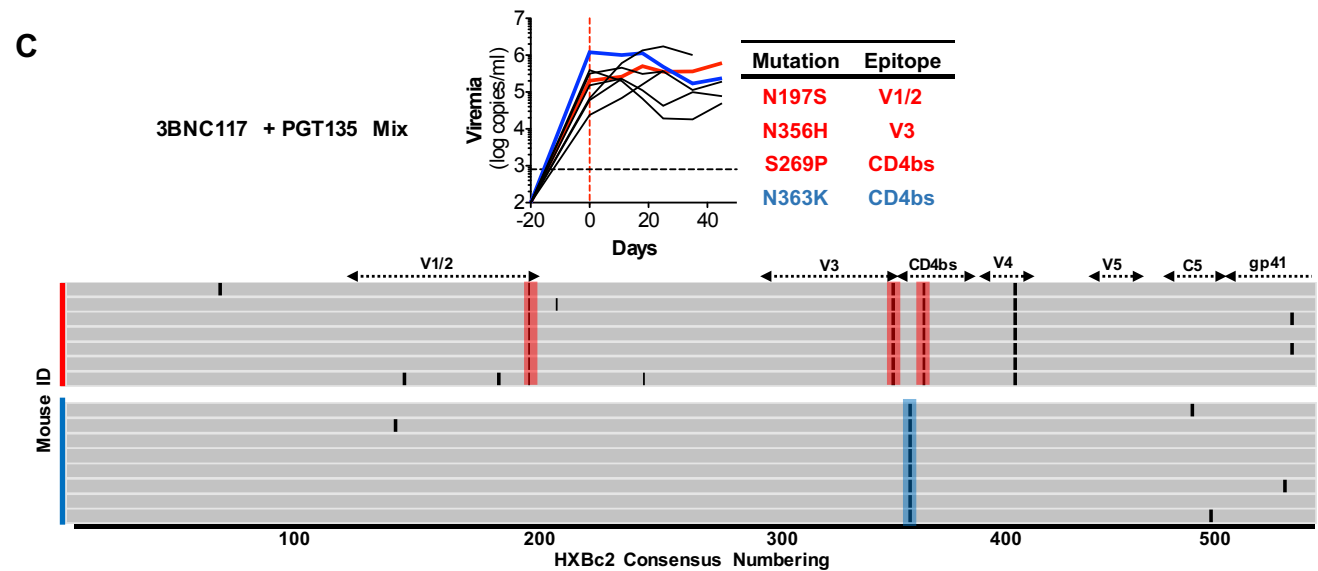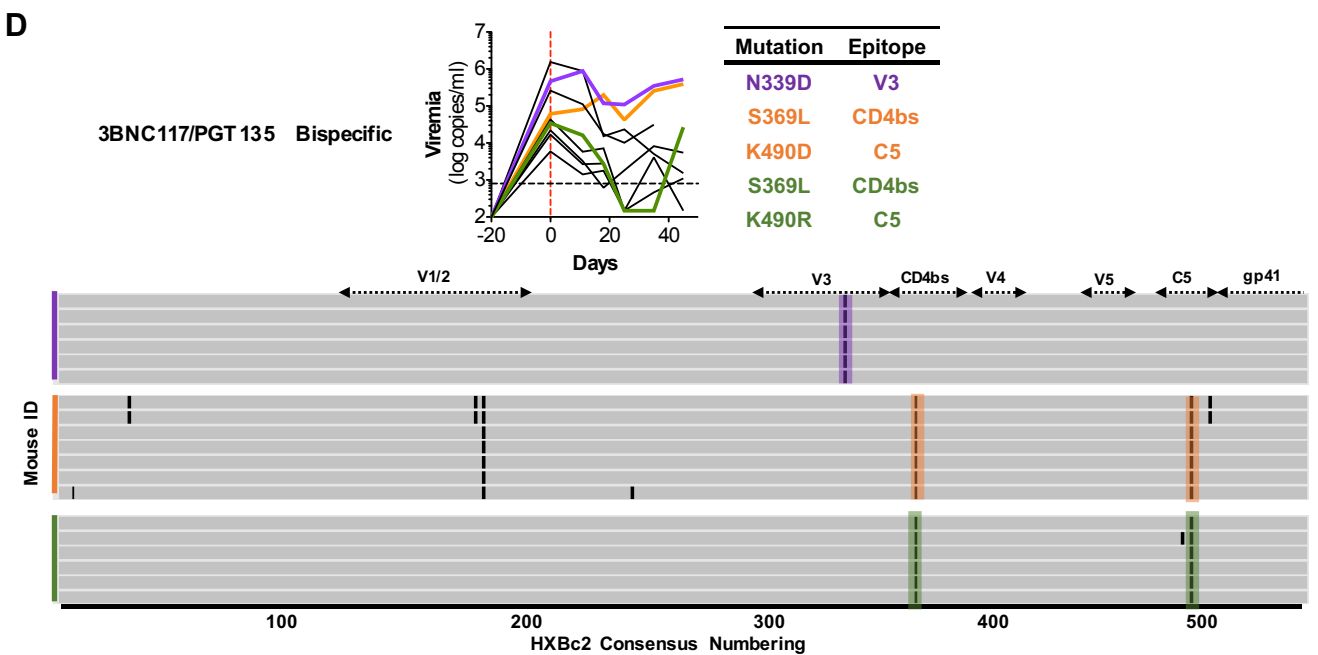

Supplement: NIHMS793677-supplement-03.pdf [file NIHMS793677-supplement-03.pdf]
